# Supplementary material for: Shut-in temperature profiles tell where the water went
Source: Springer Nature journal article supplement (doi:10.1007/s40121-024-00948-9), 1968-05-13
Supplement: MOESM1 [file 26871970]

**Title:**

Estimation of symptomatic respiratory syncytial virus infection incidence in adults in multiple countries: a time-series model-based analysis protocol

**Author details**

Robin Bruyndonckx<sup>1</sup>, Aleksandra Polkowska-Kramek<sup>1</sup>, Caihua Liang<sup>2</sup>, Charles Nuttens<sup>2</sup>, Thao Mai Phuong Tran<sup>1</sup>, Bradford D. Gessner<sup>2</sup>, Elizabeth Begier<sup>2</sup>

**Affiliations:**

<sup>1</sup> *Epidemiology & Pharmacovigilance, P95, Leuven, Belgium.*

<sup>2</sup> *Pfizer Inc, USA; Pfizer Inc, France; Pfizer Inc, Ireland.*

**Correspondence details:**

Elizabeth Begier, MD, MPH

Email address: [Elizabeth.begier@pfizer.com](mailto:Elizabeth.begier@pfizer.com)

Phone number: +353 (87) 6148075

Corresponding address:

Pfizer Vaccines

Elizabeth Begier

9 Riverwalk

Citywest Business Campus

DUBLIN 24

REPUBLIC OF IRELAND

### Suppl Table 1. Primary outcomes

|                                        |                                                                                                                                                  |
|----------------------------------------|--------------------------------------------------------------------------------------------------------------------------------------------------|
| All cardiorespiratory disease (broad)  | ICD-9-CM codes: 460-519, 390-459 or ICD-10-CM codes: J00-J99, I00-I99 <sup>a</sup> in hospital, outpatient/GP or death registries                |
| All cardiorespiratory disease (narrow) | ICD-9-CM codes: 460-519, 410, 426-428, 430-432 or ICD-10-CM codes: J00-J99, I21, I48-I50, I63-I64 in hospital, outpatient/GP or death registries |
| All respiratory diseases               | ICD-9-CM codes: 460-519 or ICD-10-CM codes: J00-J99 <sup>a</sup> in hospital, outpatient/GP or death registries                                  |
| All cardiovascular diseases            | ICD-9-CM codes: 390-459 or ICD-10-CM codes: I00-I99 <sup>a</sup> in hospital, outpatient/GP or death registries                                  |

ICD-9-CM: International Classification of Diseases Ninth Revision; ICD-10: Clinical Modification. International Classification of Diseases, Tenth Revision, Clinical Modification.  
<sup>a</sup> On October 1, 2015, the ICD codes changed from its 9<sup>th</sup> to its 10<sup>th</sup> version; therefore, depending on the study period assessed, the use of these codes changed.

**Suppl Table 2. Outcome subcategories**

| <b>Outcome subcategory</b>         | <b>ICD-10<sup>a</sup></b>       | <b>ICD-10 nomenclature</b>                                            | <b>ICD-9<sup>a</sup></b>               | <b>ICD-9 nomenclature</b>                                              |
|------------------------------------|---------------------------------|-----------------------------------------------------------------------|----------------------------------------|------------------------------------------------------------------------|
| Influenza or Pneumonia             | J09                             | Influenza due to identified zoonotic or pandemic influenza virus      | 488                                    | Influenza due to certain identified influenza viruses                  |
|                                    | J10                             | Influenza due to identified seasonal influenza virus                  | 487                                    | Influenza                                                              |
|                                    | J11                             | Influenza, virus not identified                                       | **                                     |                                                                        |
|                                    | J12                             | Viral pneumonia, not elsewhere classified                             | 480                                    | Viral pneumonia                                                        |
|                                    | J13                             | Pneumonia due to <i>Streptococcus pneumoniae</i>                      | 481                                    | Pneumococcal pneumonia [ <i>Streptococcus pneumoniae pneumonia</i> ]   |
|                                    | J14                             | Pneumonia due to <i>Hemophilus influenzae</i>                         | 482.2                                  | Pneumonia due to <i>Hemophilus influenzae</i> ( <i>h. influenzae</i> ) |
|                                    | J15                             | Bacterial pneumonia, not elsewhere classified                         | 482                                    | Other bacterial pneumonia                                              |
|                                    | J16                             | Pneumonia due to other infectious organisms, not elsewhere classified | 483                                    | Pneumonia due to other specified organism                              |
|                                    | J17                             | Pneumonia in diseases classified elsewhere                            | 484                                    | Pneumonia in infectious diseases classified elsewhere                  |
| J18                                | Pneumonia, organism unspecified | 486                                                                   | Pneumonia, organism unspecified        |                                                                        |
|                                    |                                 | 485                                                                   | Bronchopneumonia, organism unspecified |                                                                        |
| Bronchitis or bronchiolitis        | J20                             | Acute bronchitis                                                      | 466                                    | Acute bronchitis and bronchiolitis                                     |
|                                    | J21                             | Acute bronchiolitis                                                   |                                        |                                                                        |
|                                    | J22                             | Unspecified acute lower respiratory infection                         | **                                     |                                                                        |
| Chronic lower respiratory diseases | J40                             | Bronchitis, not specified as acute or chronic                         | 490                                    | Bronchitis, not specified as acute or chronic                          |
|                                    | J41                             | Simple and mucopurulent chronic bronchitis                            | 491                                    | Chronic bronchitis                                                     |
|                                    | J42                             | Unspecified chronic bronchitis                                        | **                                     |                                                                        |
|                                    | J43                             | Emphysema                                                             | 492                                    | Emphysema                                                              |
|                                    | J44                             | Chronic obstructive pulmonary disease                                 | 496                                    | Chronic airway obstruction, not elsewhere classified                   |
|                                    | J45                             | Asthma                                                                | 493                                    | Asthma                                                                 |
|                                    | J46                             | Status asthmaticus                                                    | **                                     |                                                                        |
|                                    | J47                             | Bronchiectasis                                                        | 494                                    | Bronchiectasis                                                         |
| **                                 |                                 | 495                                                                   | Extrinsic allergic alveolitis          |                                                                        |
| Upper respiratory disease          | J00                             | Acute nasopharyngitis [common cold]                                   | 460                                    | Acute nasopharyngitis [common cold]                                    |
|                                    | J01                             | Acute sinusitis                                                       | 461                                    | Acute sinusitis                                                        |
|                                    | J02                             | Acute pharyngitis                                                     | 462                                    | Acute pharyngitis                                                      |
|                                    | J03                             | Acute tonsillitis                                                     | 463                                    | Acute tonsillitis                                                      |
|                                    | J04                             | Acute laryngitis and tracheitis                                       | 464                                    | Acute laryngitis and tracheitis                                        |
|                                    | J05                             | Acute obstructive laryngitis [croup] and epiglottitis                 | 464.3                                  | Epiglottitis                                                           |
|                                    |                                 |                                                                       | 464.4                                  | Croup                                                                  |
|                                    | J06                             | Acute upper respiratory infections of multiple and unspecified sites  | 465                                    | Acute upper respiratory infections of multiple or unspecified sites    |
|                                    | J30                             | Vasomotor and allergic rhinitis                                       | 477                                    | Allergic rhinitis                                                      |
|                                    | J31                             | Chronic rhinitis, nasopharyngitis and pharyngitis                     | 472                                    | Chronic pharyngitis and nasopharyngitis                                |
|                                    | J32                             | Chronic sinusitis                                                     | 473                                    | Chronic sinusitis                                                      |
|                                    | J33                             | Nasal polyp                                                           | 471                                    | Nasal polyps                                                           |
|                                    | J34                             | Other and unspecified disorders of nose and nasal sinuses             | 470                                    | Deviated nasal septum                                                  |
|                                    | J35                             | Chronic diseases of tonsils and adenoids                              | 474                                    | Chronic disease of tonsils and adenoids                                |
| J36                                | Peritonsillar abscess           | 475                                                                   | Peritonsillar abscess                  |                                                                        |

| Outcome subcategory                 | ICD-10 <sup>a</sup>       | ICD-10 nomenclature                                                                  | ICD-9 <sup>a</sup>                   | ICD-9 nomenclature                                                      |
|-------------------------------------|---------------------------|--------------------------------------------------------------------------------------|--------------------------------------|-------------------------------------------------------------------------|
|                                     | J37                       | Chronic laryngitis and laryngotracheitis                                             | 476                                  | Chronic laryngitis and laryngotracheitis                                |
|                                     | J38                       | Diseases of vocal cords and larynx, not elsewhere classified                         | **                                   |                                                                         |
|                                     | J39                       | Other diseases of upper respiratory tract                                            | 478                                  | Other diseases of upper respiratory tract                               |
| Chronic heart failure exacerbations | I42                       | Cardiomyopathy                                                                       | 425                                  | Cardiomyopathy                                                          |
|                                     | I43                       | Cardiomyopathy in diseases classified elsewhere                                      | 425.8                                | Cardiomyopathy in other diseases classified elsewhere                   |
|                                     | I50                       | Heart failure                                                                        | 428                                  | Heart failure                                                           |
|                                     | I51.7                     | Cardiomegaly                                                                         | 429.3                                | Cardiomegaly                                                            |
| Ischemic heart diseases             | I20                       | Angina pectoris                                                                      | 413                                  | Angina pectoris                                                         |
|                                     | I21                       | Acute myocardial infarction                                                          | 410                                  | Acute myocardial infarction                                             |
|                                     | I22                       | Subsequent myocardial infarction                                                     | **                                   |                                                                         |
|                                     | I23                       | Certain current complications following acute myocardial infarction                  | **                                   |                                                                         |
|                                     | I24                       | Other acute ischemic heart diseases                                                  | 411                                  | Other acute and subacute forms of ischemic heart disease                |
|                                     | I25                       | Chronic ischemic heart disease                                                       | 412<br>414                           | Old myocardial infarct<br>Other forms of chronic ischemic heart disease |
| Arrhythmias                         | I44                       | Atrioventricular and left bundle-branch block,                                       | 426                                  | Conduction disorders                                                    |
|                                     | I45                       | Other conduction disorders                                                           | 427                                  | Cardiac dysrhythmias                                                    |
|                                     | I46                       | Cardiac arrest                                                                       | 427.5                                | Cardiac arrest                                                          |
|                                     | I47                       | Paroxysmal tachycardia                                                               | 427.0                                | Paroxysmal supraventricular tachycardia                                 |
|                                     |                           |                                                                                      | 427.1                                | Paroxysmal ventricular tachycardia                                      |
|                                     |                           |                                                                                      | 427.2                                | Paroxysmal tachycardia unspecified                                      |
|                                     | I48                       | Atrial fibrillation and flutter                                                      | 427.3                                | Atrial fibrillation and flutter                                         |
| I49                                 | Other cardiac arrhythmias | 427.8                                                                                | Other specified cardiac dysrhythmias |                                                                         |
| Cerebrovascular diseases            | I60                       | Subarachnoid hemorrhage                                                              | 430                                  | Subarachnoid haemorrhage                                                |
|                                     | I61                       | Intracerebral hemorrhage                                                             | 431                                  | Intracerebral hemorrhage                                                |
|                                     | I62                       | Other nontraumatic intracranial hemorrhage                                           | 432                                  | Other and unspecified intracranial hemorrhage                           |
|                                     | I63                       | Cerebral infarction                                                                  | **                                   |                                                                         |
|                                     | I64                       | Stroke, not specified as haemorrhage or infarction                                   | **                                   |                                                                         |
|                                     | I65                       | Occlusion and stenosis of precerebral arteries, not resulting in cerebral infarction | 433                                  | Occlusion and stenosis of precerebral arteries                          |
|                                     | I66                       | Occlusion and stenosis of cerebral arteries, not resulting in cerebral infarction    | 434                                  | Occlusion of cerebral arteries                                          |
|                                     | I67                       | Other cerebrovascular diseases                                                       | 436                                  | Acute but ill-defined cerebrovascular disease                           |
|                                     | I68                       | Cerebrovascular disorders in diseases classified elsewhere                           | 437                                  | Other and ill-defined cerebrovascular disease                           |
|                                     | **                        |                                                                                      | 435                                  | Transient cerebral ischemia                                             |
| Myocarditis                         | I40                       | Acute myocarditis                                                                    | 422                                  | Acute myocarditis                                                       |
|                                     | I41                       | Myocarditis in diseases classified elsewhere                                         | 422.0                                | Acute myocarditis in diseases classified elsewhere                      |
|                                     | I51.4                     | Myocarditis, unspecified                                                             | 429.0                                | Myocarditis, unspecified                                                |
|                                     | I51.5                     | Myocardial degeneration                                                              | 429.1                                | Myocardial degeneration                                                 |

ICD-9-CM: International Classification of Diseases Ninth Revision; ICD-10: Clinical Modification. International Classification of Diseases, Tenth Revision, Clinical Modification. RSV: respiratory syncytial virus.

<sup>a</sup> On October 1, 2015, the ICD codes changed from its 9th to its 10th version; therefore, depending on the study period assessed, the use of these codes changed.

**Suppl Table 3. Risk factors for RSV**

| <b>Risk group category</b> | <b>ICD-9-CM*</b>                                            | <b>ICD-9-CM nomenclature</b>                             | <b>ICD-10-CM*</b>                                           | <b>ICD-10-CM nomenclature</b>                                                                                                                                                                                                                                                                                             |
|----------------------------|-------------------------------------------------------------|----------------------------------------------------------|-------------------------------------------------------------|---------------------------------------------------------------------------------------------------------------------------------------------------------------------------------------------------------------------------------------------------------------------------------------------------------------------------|
| Chronic cardiac disease    | 393                                                         | Chronic rheumatic pericarditis                           | I09.2                                                       | Chronic rheumatic pericarditis                                                                                                                                                                                                                                                                                            |
|                            | 394                                                         | Diseases of mitral valve                                 | I05                                                         | Rheumatic mitral valve diseases                                                                                                                                                                                                                                                                                           |
|                            | 395                                                         | Diseases of aortic valve                                 | I06                                                         | Rheumatic aortic valve diseases                                                                                                                                                                                                                                                                                           |
|                            | 396                                                         | Diseases of mitral and aortic valves                     | I08.0                                                       | Rheumatic disorders of both mitral and aortic valves                                                                                                                                                                                                                                                                      |
|                            | 397                                                         | Diseases of other endocardial structures                 | ***                                                         | Not equivalent code in ICD-10                                                                                                                                                                                                                                                                                             |
|                            | 398                                                         | Other rheumatic heart disease                            | I09                                                         | Other rheumatic heart diseases                                                                                                                                                                                                                                                                                            |
|                            | 402                                                         | Hypertensive heart disease                               | I11                                                         | Hypertensive heart disease                                                                                                                                                                                                                                                                                                |
|                            | 404                                                         | Hypertensive heart and chronic kidney disease            | I13                                                         | Hypertensive heart and chronic kidney disease                                                                                                                                                                                                                                                                             |
|                            | 410                                                         | Acute myocardial infarction                              | I21-I23                                                     | I21: ST elevation (STEMI) and non-ST elevation (NSTEMI) myocardial infarction<br>I22: Subsequent ST elevation (STEMI) and non-ST elevation (NSTEMI) myocardial infarction<br>I23: Certain current complications following ST elevation (STEMI) and non-ST elevation (NSTEMI) myocardial infarction (within 28 day period) |
|                            | 411                                                         | Other acute and subacute forms of ischemic heart disease | I24                                                         | Other acute ischemic heart diseases                                                                                                                                                                                                                                                                                       |
|                            | 412                                                         | Old myocardial infarction                                | I25.2                                                       | Old myocardial infarction                                                                                                                                                                                                                                                                                                 |
|                            | 413                                                         | Angina pectoris                                          | I20                                                         | Angina pectoris                                                                                                                                                                                                                                                                                                           |
|                            | 414                                                         | Other forms of chronic ischemic heart disease            | I25.8                                                       | Other forms of chronic ischemic heart disease                                                                                                                                                                                                                                                                             |
|                            | 416                                                         | Chronic pulmonary heart disease                          | I27                                                         | Other pulmonary heart diseases                                                                                                                                                                                                                                                                                            |
|                            | V45.00                                                      | Unspecified cardiac device in situ                       | Z95.9                                                       | Presence of cardiac and vascular implant and graft, unspecified                                                                                                                                                                                                                                                           |
|                            | V45.81                                                      | Aortocoronary bypass status                              | Z95.1                                                       | Presence of aortocoronary bypass graft                                                                                                                                                                                                                                                                                    |
|                            | 424                                                         | Other diseases of endocardium                            | I34-I39                                                     | I34: Nonrheumatic mitral valve disorders<br>I35: Nonrheumatic aortic valve disorders<br>I36: Nonrheumatic tricuspid valve disorders<br>I37: Nonrheumatic pulmonary valve disorders<br>I38: Endocarditis, valve unspecified<br>I39: Endocarditis and heart valve disorders in diseases classified elsewhere                |
|                            | 425                                                         | Cardiomyopathy                                           | I42                                                         | Cardiomyopathy                                                                                                                                                                                                                                                                                                            |
|                            | 426                                                         | Conduction disorders                                     | I45                                                         | Other conduction disorders                                                                                                                                                                                                                                                                                                |
|                            | 427                                                         | Cardiac dysrhythmias                                     | I49                                                         | Other cardiac arrhythmias                                                                                                                                                                                                                                                                                                 |
| 428                        | Heart failure                                               | I50                                                      | Heart failure                                               |                                                                                                                                                                                                                                                                                                                           |
| 429                        | Ill-defined descriptions and complications of heart disease | I51                                                      | Complications and ill-defined descriptions of heart disease |                                                                                                                                                                                                                                                                                                                           |

| <b>Risk group category</b>   | <b>ICD-9-CM*</b> | <b>ICD-9-CM nomenclature</b>                                        | <b>ICD-10-CM*</b> | <b>ICD-10-CM nomenclature</b>                                                       |
|------------------------------|------------------|---------------------------------------------------------------------|-------------------|-------------------------------------------------------------------------------------|
|                              | 440              | Atherosclerosis                                                     | I70               | Atherosclerosis                                                                     |
|                              | 745              | Bulbus cordis anomalies and anomalies of cardiac septal closure     | Q21               | Congenital malformations of cardiac septa                                           |
|                              | 746              | Other congenital anomalies of heart                                 | Q24               | Other congenital malformations of heart                                             |
|                              | 747              | Other congenital anomalies of circulatory system                    | Q28               | Other congenital malformations of circulatory system                                |
|                              | 427.5            | Cardiac arrest                                                      | I46               | Cardiac arrest                                                                      |
|                              | ***              | Not equivalent code in ICD-9                                        | I97.1             | Other postprocedural cardiac functional disturbances                                |
| Chronic respiratory diseases | 490              | Bronchitis, not specified as acute or chronic                       | J40               | Bronchitis, not specified as acute or chronic                                       |
|                              | 491              | Chronic bronchitis                                                  | J41, J42          | J41 Simple and mucopurulent chronic bronchitis, J42: Unspecified chronic bronchitis |
|                              | 492              | Emphysema                                                           | J43               | Emphysema                                                                           |
|                              | 493              | Asthma                                                              | J45               | Asthma                                                                              |
|                              | 494              | Bronchiectasis                                                      | J47               | Bronchiectasis                                                                      |
|                              | 495              | Extrinsic allergic alveolitis                                       | ***               | Not equivalent code in ICD-10                                                       |
|                              | 496              | Chronic airway obstruction, not elsewhere classified                | J44               | Other chronic obstructive pulmonary disease                                         |
|                              | 500              | Coal workers' pneumoconiosis                                        | J60               | Coal workers' pneumoconiosis                                                        |
|                              | 501              | Asbestosis                                                          | J61               | Pneumoconiosis due to asbestos and other mineral fibers                             |
|                              | 502              | Pneumoconiosis due to other silica or silicates                     | J62               | Pneumoconiosis due to dust containing silica                                        |
|                              | 503              | Pneumoconiosis due to other inorganic dust                          | J63               | Pneumoconiosis due to other inorganic dust                                          |
|                              | 504              | Pneumonopathy due to inhalation of other dust                       | ***               | Not equivalent code in ICD-10                                                       |
|                              | 505              | Pneumoconiosis, unspecified                                         | J64               | Pneumoconiosis, unspecified                                                         |
|                              | 506              | Respiratory conditions due to chemical fumes and vapors             | J68               | Respiratory conditions due to inhalation of chemicals, gases, fumes and vapors      |
|                              | 507              | Pneumonitis due to solids and liquids                               | J69               | Pneumonitis due to solids and liquids                                               |
|                              | 508              | Respiratory conditions due to other and unspecified external agents | J70               | Respiratory conditions due to other external agents                                 |
|                              | 277              | Cystic fibrosis                                                     | E84               | Cystic fibrosis                                                                     |
|                              | 513              | Abscess of lung and mediastinum                                     | J85               | Abscess of lung and mediastinum                                                     |
|                              | 514              | Pulmonary congestion and hypostasis                                 | J81               | Hypostatic pneumonia, unspecified organism; Chronic pulmonary edema                 |
|                              | 515              | Post inflammatory pulmonary fibrosis                                | J84.10, J84.89    | Pulmonary fibrosis, unspecified; Other specified interstitial pulmonary diseases    |
|                              | 516              | Other alveolar and parietoalveolar pneumonopathy                    | J84.09            | Other alveolar and parieto-alveolar conditions                                      |
|                              | 517              | Lung involvement in conditions classified elsewhere                 | ***               | Not equivalent code in ICD-10                                                       |
|                              | 518              | Other diseases of lung                                              | J98.4             | Other disorders of lung                                                             |
| Diabetes mellitus            | 250              | Diabetes mellitus                                                   | E08-E13           | Diabetes mellitus                                                                   |
|                              | 251              | Other disorders of pancreatic internal secretion                    | E16               | Other disorders of pancreatic internal secretion                                    |

| Risk group category    | ICD-9-CM*                                         | ICD-9-CM nomenclature                                                                                                                                                    | ICD-10-CM*                                  | ICD-10-CM nomenclature                                                                                                                                                                                                                                                                                                                                                                              |
|------------------------|---------------------------------------------------|--------------------------------------------------------------------------------------------------------------------------------------------------------------------------|---------------------------------------------|-----------------------------------------------------------------------------------------------------------------------------------------------------------------------------------------------------------------------------------------------------------------------------------------------------------------------------------------------------------------------------------------------------|
|                        | 357.2                                             | Polyneuropathy in diabetes                                                                                                                                               | E08.42, E09.42, E10.42, E11.42, E13.42      | E08.42 Diabetes mellitus due to underlying condition with diabetic polyneuropathy; E09.42 Drug or chemical induced diabetes mellitus with neurological complications with diabetic polyneuropathy; E10.42 Type 1 diabetes mellitus with diabetic polyneuropathy; E11.42 Type 2 diabetes mellitus with diabetic polyneuropathy E13.42 Other specified diabetes mellitus with diabetic polyneuropathy |
|                        | 362.0                                             | Diabetic retinopathy                                                                                                                                                     | E10.31, E11.31                              | Type 1 diabetes mellitus with unspecified diabetic retinopathy; Type 2 diabetes mellitus with unspecified diabetic retinopathy                                                                                                                                                                                                                                                                      |
|                        | 362.11                                            | Hypertensive retinopathy                                                                                                                                                 | H35.039                                     | Hypertensive retinopathy, unspecified eye                                                                                                                                                                                                                                                                                                                                                           |
|                        | 366.41                                            | Diabetic cataract                                                                                                                                                        | E08.36, E09.36, E10.36, E11.36, E13.36      | E08.36 Diabetes mellitus due to underlying condition with diabetic cataract; E09.36 Drug or chemical induced diabetes mellitus with diabetic cataract; E10.36 Type 1 diabetes mellitus with diabetic cataract; E11.36 Type 2 diabetes mellitus with diabetic cataract; E13.36 Other specified diabetes mellitus with diabetic cataract                                                              |
|                        | 648                                               | Diabetes mellitus complicating pregnancy childbirth or the puerperium                                                                                                    | O24                                         | Diabetes mellitus in pregnancy, childbirth, and the puerperium                                                                                                                                                                                                                                                                                                                                      |
| Chronic liver disease  | 570-573                                           | 570 Acute and subacute necrosis of liver; 571 Chronic liver disease and cirrhosis; 572 Liver abscess and sequelae of chronic liver disease; 573 Other disorders of liver | K70-K77                                     | Diseases of liver                                                                                                                                                                                                                                                                                                                                                                                   |
|                        | 751.62                                            | Congenital cystic disease of liver                                                                                                                                       | Q44.6                                       | Cystic disease of liver                                                                                                                                                                                                                                                                                                                                                                             |
| Chronic kidney disease | 403                                               | Hypertensive chronic kidney disease                                                                                                                                      | I12                                         | Hypertensive chronic kidney disease                                                                                                                                                                                                                                                                                                                                                                 |
|                        | 580                                               | Acute glomerulonephritis                                                                                                                                                 | N00                                         | Acute nephritic syndrome                                                                                                                                                                                                                                                                                                                                                                            |
|                        | 581                                               | Nephrotic syndrome                                                                                                                                                       | N04                                         | Nephrotic syndrome                                                                                                                                                                                                                                                                                                                                                                                  |
|                        | 582                                               | Chronic glomerulonephritis                                                                                                                                               | N03                                         | Chronic nephritic syndrome                                                                                                                                                                                                                                                                                                                                                                          |
|                        | 583                                               | Nephritis and nephropathy not specified as acute or chronic                                                                                                              | N05                                         | Unspecified nephritic syndrome                                                                                                                                                                                                                                                                                                                                                                      |
|                        | 584                                               | Acute kidney failure                                                                                                                                                     | N17                                         | Acute kidney failure                                                                                                                                                                                                                                                                                                                                                                                |
|                        | 585                                               | Chronic kidney disease (ckd)                                                                                                                                             | N18                                         | Chronic kidney disease (ckd)                                                                                                                                                                                                                                                                                                                                                                        |
|                        | 586                                               | Renal failure, unspecified                                                                                                                                               | N19                                         | Unspecified kidney failure                                                                                                                                                                                                                                                                                                                                                                          |
|                        | 587                                               | Renal sclerosis, unspecified                                                                                                                                             | N26.9                                       | Renal sclerosis, unspecified                                                                                                                                                                                                                                                                                                                                                                        |
|                        | 588                                               | Disorders resulting from impaired renal function                                                                                                                         | N25                                         | Disorders resulting from impaired renal tubular function                                                                                                                                                                                                                                                                                                                                            |
|                        | 589                                               | Small kidney of unknown cause                                                                                                                                            | N27                                         | Small kidney of unknown cause                                                                                                                                                                                                                                                                                                                                                                       |
|                        | 590                                               | Infections of kidney                                                                                                                                                     | ***                                         | Not equivalent code in ICD-10                                                                                                                                                                                                                                                                                                                                                                       |
|                        | 591                                               | Hydronephrosis                                                                                                                                                           | N13.30                                      | Unspecified hydronephrosis                                                                                                                                                                                                                                                                                                                                                                          |
|                        | 593.8                                             | Other specified disorders of kidney and ureter                                                                                                                           | N28.8                                       | Other specified disorders of kidney and ureter                                                                                                                                                                                                                                                                                                                                                      |
|                        | V42.0                                             | Kidney replaced by transplant                                                                                                                                            | V42.0, Z94.0                                | Kidney replaced by transplant; Kidney transplant status                                                                                                                                                                                                                                                                                                                                             |
|                        | V45.1                                             | Postsurgical renal dialysis status                                                                                                                                       | ***                                         | Not equivalent code in ICD-10                                                                                                                                                                                                                                                                                                                                                                       |
| V56                    | Encounter for dialysis and dialysis catheter care | Z49                                                                                                                                                                      | Encounter for care involving renal dialysis |                                                                                                                                                                                                                                                                                                                                                                                                     |

| Risk group category | ICD-9-CM* | ICD-9-CM nomenclature                                                        | ICD-10-CM*                             | ICD-10-CM nomenclature                                                                                                                                                                              |
|---------------------|-----------|------------------------------------------------------------------------------|----------------------------------------|-----------------------------------------------------------------------------------------------------------------------------------------------------------------------------------------------------|
| Immunosuppression   | 042       | Human immunodeficiency virus [HIV] disease                                   | B20                                    | Human immunodeficiency virus [HIV] disease                                                                                                                                                          |
|                     | 079.5     | Retrovirus in conditions classified elsewhere and of unspecified site        | ***                                    | Not equivalent code in ICD-10                                                                                                                                                                       |
|                     | 279       | Disorders involving the immune mechanism                                     | ***                                    | Not equivalent code in ICD-10                                                                                                                                                                       |
|                     | 288.0     | Neutropenia                                                                  | ***                                    | Not equivalent code in ICD-10                                                                                                                                                                       |
|                     | 288.1     | Functional disorders of polymorphonuclear neutrophils                        | D71                                    | Functional disorders of polymorphonuclear neutrophils                                                                                                                                               |
|                     | 288.2     | Genetic anomalies of leukocytes                                              | D72.0                                  | Genetic anomalies of leukocytes                                                                                                                                                                     |
|                     | 446       | Polyarteritis nodosa and allied conditions                                   | M30                                    | Polyarteritis nodosa and related conditions                                                                                                                                                         |
|                     | 710       | Systemic lupus erythematosus                                                 | M32                                    | Systemic lupus erythematosus (SLE)                                                                                                                                                                  |
|                     | 710.2     | Sicca syndrome                                                               | M35.00, M35.1                          | M35.00 Sjögren syndrome, unspecified; M35.01 Sjögren syndrome with keratoconjunctivitis                                                                                                             |
|                     | 710.4     | Polymyositis                                                                 | M33.2                                  | Polymyositis                                                                                                                                                                                        |
|                     | 714       | Rheumatoid arthritis and other inflammatory polyarthropathies                | M06                                    | Other rheumatoid arthritis                                                                                                                                                                          |
|                     | V08       | Asymptomatic human immunodeficiency virus [HIV] infection status             | Z21                                    | Asymptomatic human immunodeficiency virus [HIV] infection status                                                                                                                                    |
|                     | V42.0     | Kidney replaced by transplant                                                | Z94.0                                  | Kidney transplant status                                                                                                                                                                            |
|                     | V42.1     | Heart replaced by transplant                                                 | Z94.1                                  | Heart transplant status                                                                                                                                                                             |
|                     | V42.2     | Heart valve replaced by transplant                                           | Z95.3                                  | Presence of xenogenic heart valve                                                                                                                                                                   |
|                     | V42.6     | Lung replaced by transplant                                                  | Z94.2                                  | Lung transplant status                                                                                                                                                                              |
|                     | V42.7     | Liver replaced by transplant                                                 | Z94.4                                  | Liver transplant status                                                                                                                                                                             |
|                     | V42.8     | Other specified organ or tissue replaced by transplant                       | Z94.81, Z94.84, Z94.83, Z94.82, Z94.89 | Z94.81 Bone marrow transplant status, Z94.84 Stem cells transplant status, Z94.83 Pancreas transplant status; Z94.82 Intestine transplant status, Z94.89 Other transplanted organ and tissue status |
|                     | V42.9     | Unspecified organ or tissue replaced by transplant                           | Z94.9                                  | Transplanted organ and tissue status, unspecified                                                                                                                                                   |
|                     | V58.0     | Encounter for radiotherapy                                                   | Z51.0                                  | Encounter for antineoplastic radiation therapy                                                                                                                                                      |
|                     | V58.1     | Encounter for antineoplastic chemotherapy and immunotherapy                  | Z51.11, Z51.12                         | Z51.11 Encounter for antineoplastic chemotherapy; Z51.12 Encounter for antineoplastic immunotherapy                                                                                                 |
|                     | 235-239   | 235-238 Neoplasms Of Uncertain Behavior; 239 Neoplasms Of Unspecified Nature | D37-D48                                | Neoplasms of uncertain or unknown behaviour                                                                                                                                                         |
|                     | 140-149   | Malignant Neoplasm Of Lip, Oral Cavity, And Pharynx                          | C00-C14                                | Malignant neoplasms of lip, oral cavity and pharynx                                                                                                                                                 |
|                     | 150-159   | Malignant Neoplasm Of Digestive Organs And Peritoneum                        | C15-C26                                | Malignant neoplasms of digestive organs                                                                                                                                                             |
|                     | 160-165   | Malignant Neoplasm Of Respiratory And Intrathoracic Organs                   | C30-C39                                | Malignant neoplasms of respiratory and intrathoracic organs                                                                                                                                         |
|                     | 170-176   | Malignant Neoplasm Of Bone, Connective Tissue, Skin, And Breast              | C40-C41, C43-C44, C45-C49, C50-C50     | Malignant neoplasms of bone and articular cartilage, Melanoma and other malignant neoplasms of skin, Malignant neoplasms of mesothelial and soft tissue, Malignant neoplasms of breast              |



| Risk group category    | ICD-9-CM*           | ICD-9-CM nomenclature                                                                                                                                                                   | ICD-10-CM*               | ICD-10-CM nomenclature                                                                                                                                                                                                                                                                                         |
|------------------------|---------------------|-----------------------------------------------------------------------------------------------------------------------------------------------------------------------------------------|--------------------------|----------------------------------------------------------------------------------------------------------------------------------------------------------------------------------------------------------------------------------------------------------------------------------------------------------------|
|                        | 179-189             | Malignant Neoplasm Of Genitourinary Organs                                                                                                                                              | C51-C58, C60-63, C64-C68 | Malignant neoplasms of female genital organs, Malignant neoplasms of male genital organs, Malignant neoplasms of urinary tract                                                                                                                                                                                 |
|                        | 190-192             | Malignant neoplasm of eye, Malignant neoplasm of brain, Malignant neoplasm of other and unspecified parts of nervous system                                                             | C69-C72                  | Malignant neoplasms of eye, brain and other parts of central nervous system                                                                                                                                                                                                                                    |
|                        | 193, 194            | Malignant neoplasm of thyroid gland, Malignant neoplasm of other endocrine glands and related structures                                                                                | C73-C75                  | Malignant neoplasms of thyroid and other endocrine glands                                                                                                                                                                                                                                                      |
|                        | 195, 199            | Malignant neoplasm of other and ill-defined sites, Malignant neoplasm without specification of site                                                                                     | C76-C80                  | Malignant neoplasms of ill-defined, other secondary and unspecified sites                                                                                                                                                                                                                                      |
|                        | 200-202             | 200 Lymphosarcoma and reticulosarcoma and other specified malignant tumors of lymphatic tissue; 201 Hodgkin's disease; 202 Other malignant neoplasms of lymphoid and histiocytic tissue | C81-C88                  | C81 Hodgkin lymphoma, C82 Follicular lymphoma, C83 Non-follicular lymphoma, C84 Mature T/NK-cell lymphomas, C85 Other specified and unspecified types of non-Hodgkin lymphoma, C86 Other specified types of T/NK-cell lymphoma, C88 Malignant immunoproliferative diseases and certain other B-cell lymphomas, |
|                        | 203.1, 204-208      | 203.1 Plasma cell leukemia, 204 Lymphoid leukemia, 205 Myeloid leukemia, 206 Monocytic leukemia, 207 Other specified leukemia, 208 Leukemia of unspecified cell type                    | C90.1; C91-C95           | C90.1 Plasma cell leukemia, C91 Lymphoid leukemia, C92 Myeloid leukemia, C93 Monocytic leukemia, C94 Other leukemias of specified cell type, C95 Leukemia of unspecified cell type                                                                                                                             |
|                        | 235-238             | Neoplasms Of Uncertain Behavior                                                                                                                                                         | D37-D48                  | Neoplasms of uncertain behavior, polycythemia vera and myelodysplastic syndromes                                                                                                                                                                                                                               |
|                        | 279                 | Disorders involving the immune mechanism                                                                                                                                                | D80-D84 and D89          | D80 Immunodeficiency with predominantly antibody defects<br>D81 Combined immunodeficiencies<br>D82 Immunodeficiency associated with other major defects<br>D83 Common variable immunodeficiency<br>D84 Other immunodeficiencies D89 Other disorders involving the immune mechanism, not elsewhere classified   |
|                        | ***                 | No equivalent in ICD-9                                                                                                                                                                  | T86                      | Complications of transplanted organs and tissue                                                                                                                                                                                                                                                                |
|                        | V42                 | Organ or tissue replaced by transplant                                                                                                                                                  | Z94.6                    | Solid organ transplantation                                                                                                                                                                                                                                                                                    |
|                        | 710.0               | Systemic lupus erythematosus                                                                                                                                                            | M32                      | Systemic lupus erythematosus                                                                                                                                                                                                                                                                                   |
|                        | 714.0               | Rheumatoid arthritis                                                                                                                                                                    | M05; M06; M08            | Rheumatoid arthritis                                                                                                                                                                                                                                                                                           |
|                        | 696.0, 696.1, 696.8 | Psoriatic arthropathy, Other psoriasis, Other psoriasis and similar disorders                                                                                                           | L40                      | Psoriasis                                                                                                                                                                                                                                                                                                      |
|                        |                     | No equivalent in ICD-9                                                                                                                                                                  | M07                      | Enteropathic arthropathies                                                                                                                                                                                                                                                                                     |
|                        | 446.5               | Giant cell arteritis                                                                                                                                                                    | M31.5; M31.6             | Giant cell arteritis with polymyalgia rheumatica, Other giant cell arteritis                                                                                                                                                                                                                                   |
| Neurological disorders | 742                 | Other congenital anomalies of nervous system                                                                                                                                            | Q00-Q07                  | Congenital malformations of the nervous system                                                                                                                                                                                                                                                                 |
|                        | 320-327 , 330-337   | Inflammatory Diseases Of The Central Nervous System, Hereditary And Degenerative Diseases Of The Central Nervous System                                                                 | G10-G39                  | G10-G09 Inflammatory diseases of the central nervous system, G10-G14 Systemic atrophies primarily affecting the central nervous system,                                                                                                                                                                        |

| <b>Risk group category</b> | <b>ICD-9-CM*</b>      | <b>ICD-9-CM nomenclature</b>                                                                                                                                                                                       | <b>ICD-10-CM*</b> | <b>ICD-10-CM nomenclature</b>                                                                                                                          |
|----------------------------|-----------------------|--------------------------------------------------------------------------------------------------------------------------------------------------------------------------------------------------------------------|-------------------|--------------------------------------------------------------------------------------------------------------------------------------------------------|
|                            | 435                   | Transient cerebral ischemia                                                                                                                                                                                        | G45-G46           | G45 Transient cerebral ischemic attacks and related syndromes, Vascular syndromes of brain in cerebrovascular diseases                                 |
|                            | 340, 341,<br>347-349, | 340 Multiple sclerosis<br>341 Other demyelinating diseases of central nervous system<br>347 Cataplexy and narcolepsy<br>348 Other conditions of brain<br>349 Other and unspecified disorders of the nervous system | G70-G99           | G70-G73 Diseases of myoneural junction and muscle, G80-G83 Cerebral palsy and other paralytic syndromes, G89-G99 Other disorders of the nervous system |

ICD-9-CM: International Classification of Diseases Ninth Revision; ICD-10: Clinical Modification. International Classification of Diseases, Tenth Revision, Clinical Modification.  
RSV: respiratory syncytial virus.

\*On October 1, 2015, the ICD codes changed from its 9th to its 10th version; therefore, depending on the study period assessed, the use of these codes changed.

**Suppl Table 4. Shell table: outcome data**

| Year | Time: unit   | Time: value <sup>a</sup> | Age group (years) | Risk group (when applicable) | Event count <sup>b</sup> |
|------|--------------|--------------------------|-------------------|------------------------------|--------------------------|
| 2010 | Week / Month | 1                        | 18-44             | Yes                          |                          |
| 2010 | Week / Month | 1                        | 45-64             | Yes                          |                          |
| 2010 | Week / Month | 1                        | 65-79             | Yes                          |                          |
| 2010 | Week / Month | 1                        | ≥80               | Yes                          |                          |
| 2010 | Week / Month | 1                        | 18-44             | No                           |                          |
| 2010 | Week / Month | 1                        | 45-64             | No                           |                          |
| 2010 | Week / Month | 1                        | 65-79             | No                           |                          |
| 2010 | Week / Month | 1                        | ≥80               | No                           |                          |
| 2010 | Week / Month | 2                        | 18-44             | Yes                          |                          |
| 2010 | Week / Month | 2                        | 45-64             | Yes                          |                          |
| 2010 | Week / Month | 2                        | 65-79             | Yes                          |                          |
| 2010 | Week / Month | 2                        | ≥80               | Yes                          |                          |
| 2010 | Week / Month | 2                        | 18-44             | No                           |                          |
| 2010 | Week / Month | 2                        | 45-64             | No                           |                          |
| 2010 | Week / Month | 2                        | 65-79             | No                           |                          |
| 2010 | Week / Month | 2                        | ≥80               | No                           |                          |
| ...  | ...          | ...                      | ...               | ...                          | ...                      |
| 2019 | Week / Month | 52 / 12 <sup>a</sup>     | 18-44             | Yes                          |                          |
| 2019 | Week / Month | 52 / 12 <sup>a</sup>     | 45-64             | Yes                          |                          |
| 2019 | Week / Month | 52 / 12 <sup>a</sup>     | 65-79             | Yes                          |                          |
| 2019 | Week / Month | 52 / 12 <sup>a</sup>     | ≥80               | Yes                          |                          |
| 2019 | Week / Month | 52 / 12 <sup>a</sup>     | 18-44             | No                           |                          |
| 2019 | Week / Month | 52 / 12 <sup>a</sup>     | 45-64             | No                           |                          |
| 2019 | Week / Month | 52 / 12 <sup>a</sup>     | 65-79             | No                           |                          |
| 2019 | Week / Month | 52 / 12 <sup>a</sup>     | ≥80               | No                           |                          |

<sup>a</sup> ranging from week 1 to 52 (or 53 for leap year) if time unit is week; ranging from 1 to 12 if time unit is month.

<sup>b</sup> Events refer to one column for each event type and outcome. Planned event types include general practitioner visits, emergency department visits, hospitalizations, and deaths. Planned outcomes include all cardiorespiratory (broad), selected cardiorespiratory (narrow), all respiratory, all cardiovascular, influenza or pneumonia, bronchitis or bronchiolitis, chronic lower respiratory diseases, upper respiratory diseases, chronic heart failure exacerbations, ischemic heart diseases, arrhythmias, cerebrovascular diseases, and myocarditis.

**Suppl Table 5. Shell table: weekly viral proxy data**

| Year | Time: unit | Time: value <sup>a</sup> | RSV   |       |       |       |      | Influenza |       |       |       |      |
|------|------------|--------------------------|-------|-------|-------|-------|------|-----------|-------|-------|-------|------|
|      |            |                          | Lag 0 | Lag 1 | Lag 2 | Lag 3 | Lag4 | Lag 0     | Lag 1 | Lag 2 | Lag 3 | Lag4 |
| 2010 | Week       | 1                        |       |       |       |       |      |           |       |       |       |      |
| 2010 | Week       | 2                        |       |       |       |       |      |           |       |       |       |      |
| 2010 | Week       | 3                        |       |       |       |       |      |           |       |       |       |      |
| ...  | ...        | ...                      | ...   |       |       |       |      |           |       |       |       |      |
| 2019 | Week       | 51                       |       |       |       |       |      |           |       |       |       |      |
| 2019 | Week       | 52                       |       |       |       |       |      |           |       |       |       |      |

**Suppl Table 6. Shell table: monthly viral proxy data**

| Year | Time: unit | Time: value <sup>a</sup> | RSV | Influenza |
|------|------------|--------------------------|-----|-----------|
| 2010 | Month      | 1                        |     |           |
| 2010 | Month      | 2                        |     |           |
| 2010 | Month      | 3                        |     |           |
| ...  | ...        | ...                      | ... |           |
| 2019 | Month      | 11                       |     |           |
| 2019 | Month      | 12                       |     |           |

# **Respiratory syncytial virus (RSV) model-based study: Statistical Analysis Plan – SPAIN**

Model-based approach to estimate RSV disease incidence, including hospitalizations, and deaths.

## TABLE OF CONTENTS

|                                                            |    |
|------------------------------------------------------------|----|
| ABBREVIATIONS .....                                        | 3  |
| 1 BACKGROUND .....                                         | 4  |
| 2 OBJECTIVES .....                                         | 4  |
| 2.1 Primary objectives.....                                | 4  |
| 2.2 Secondary objectives .....                             | 5  |
| 3 STUDY DESIGN.....                                        | 5  |
| 3.1 Study population.....                                  | 5  |
| 3.2 Study period.....                                      | 5  |
| 3.3 Data sources.....                                      | 5  |
| 4 OPERATIONAL DEFINITIONS.....                             | 6  |
| 4.1 Event types.....                                       | 6  |
| 4.2 Outcomes.....                                          | 6  |
| 4.2.1 Primary outcomes.....                                | 7  |
| 4.2.2 Secondary outcomes.....                              | 7  |
| 4.3 Alternative outcomes.....                              | 10 |
| 4.4 Viral proxies .....                                    | 11 |
| 4.5 Other variables.....                                   | 11 |
| 5 SAMPLE SIZE CONSIDERATIONS.....                          | 12 |
| 6 DATA TRANSFORMATIONS .....                               | 12 |
| 6.1 Hospitalization data file .....                        | 12 |
| 6.1.1 Hospitalization outcome data file.....               | 13 |
| 6.1.2 Cardiorespiratory data file .....                    | 13 |
| 6.1.3 Hospital-based viral proxy data file .....           | 14 |
| 6.1.3.1 Weekly hospital-based viral proxy data file.....   | 14 |
| 6.1.3.2 Monthly hospital-based viral proxy data file ..... | 14 |
| 6.2 Mortality data file .....                              | 14 |
| 6.3 Surveillance data file.....                            | 15 |
| 6.3.1 Weekly surveillance-based viral proxy data file..... | 15 |

|       |                                                        |    |
|-------|--------------------------------------------------------|----|
| 6.3.2 | Monthly surveillance-based viral proxy data file ..... | 15 |
| 6.4   | Comparison of viral proxy data files .....             | 15 |
| 6.5   | Generation of analysis files .....                     | 16 |
| 6.5.1 | Hospitalization analysis file .....                    | 16 |
| 6.5.2 | Cardiorespiratory analysis file .....                  | 16 |
| 6.5.3 | Mortality analysis file .....                          | 16 |
| 7     | STATISTICAL ANALYSIS .....                             | 17 |
| 7.1   | Descriptive analysis .....                             | 17 |
| 7.2   | Main analysis .....                                    | 17 |
| 7.3   | Extrapolation to population-level .....                | 19 |
| 8     | DISSEMINATION OF STUDY RESULTS .....                   | 19 |
| 9     | SOFTWARE .....                                         | 19 |
| 10    | LIMITATIONS .....                                      | 19 |
| 11    | QUALITY CONTROL .....                                  | 20 |
| 12    | ETHICAL CONSIDERATIONS .....                           | 20 |
|       | REFERENCES .....                                       | 21 |
|       | ANNEXES .....                                          | 22 |

# ABBREVIATIONS

---

| Abbreviation | Explanation                             |
|--------------|-----------------------------------------|
| ARI          | Acute respiratory tract infection       |
| CVA          | Cerebrovascular accident                |
| COPD         | Chronic obstructive pulmonary disease   |
| ED           | Emergency department                    |
| EMR          | Electronic medical record               |
| GP           | General practitioner                    |
| ICD          | International Classification of Disease |
| LRTI         | Lower respiratory tract infection       |
| RSV          | Respiratory syncytial virus             |
| SAP          | Statistical analysis plan               |



# 1 BACKGROUND

---

Respiratory syncytial virus (RSV) is a common cause of respiratory tract infections in children and adults. In children, the disease presentation ranges from sinusitis to bronchiolitis and pneumonia. In adults, the clinical presentation typically ranges from mild disease to severe lower respiratory tract infection (LRTI) or exacerbation of chronic respiratory and cardiac disease. Annual RSV epidemics occur seasonally, primarily in colder months in temperate climates [1].

In young children, RSV is a leading cause of hospitalization for respiratory tract infection. It is estimated that in children under 5 years of age, approximately 40 million cases of RSV occur annually, of which 10% are hospitalized [2]. In older adults, RSV burden was estimated at 1.5 million episodes of acute respiratory infections (ARIs) in industrialized countries, of which 14,5% required hospitalization. In 2016, RSV was the second leading cause of death from LRTI overall, and 54% of deaths from LRTI attributable to RSV occurred in children under 5 years of age [3]. Morbidity and mortality in older adults ( $\geq 65$  years old) with underlying medical conditions is high, including those with chronic lung and heart disease, long-term care facility residents and immunocompromised patients [4].

The incidence and burden of RSV disease in adults are difficult to measure since RSV cases do not have a specific symptomatology that could distinguish them from cases of influenza and other respiratory viruses. Additionally, the incidence of RSV is underestimated due to resolution of symptoms before reaching medical attention, lack of standard-of-care testing for RSV when presenting to medical care facilities with ARI, the low diagnostic capacity and high cost of polymerase chain reaction testing. In addition, the use of RSV-specific International Classification of Diseases (ICD) codes dramatically underestimates the incidence due to the infrequency of standard-of-care testing [5]. As a result, several alternative “model-based” approaches are used to retrospectively assess RSV incidence. These approaches model claims/electronic medical record (EMR) data and apply the expected proportion of events that would be due to RSV to the events with clinical syndromes consistent with RSV (e.g., bronchitis, chronic obstructive pulmonary disease [COPD] exacerbation, pneumonia).

The aim of this statistical analysis plan (SAP) is to define a statistical model-based approach to estimate RSV disease incidence, including hospitalizations and mortality, from recorded RSV circulation in the population. This SAP focuses on the country-specific analysis for Spain.

## 2 OBJECTIVES

---

The aim of the study is to estimate the population-based epidemiologic burden of RSV. To answer this research question, a set of objectives has been set out revolving around two types of events: hospitalization and mortality (Section 4.1).

### 2.1 Primary objectives

The primary objectives, depending on availability of the required data within the databases, include for each event type in adults:

1. To estimate RSV-attributable incidence of cardiorespiratory events.
  - 1.1. To estimate RSV-attributable incidence of respiratory events.
  - 1.2. To estimate RSV-attributable incidence of circulatory events.

In children, objective 1.1 is investigated for each event type.

These objectives are assessed stratified by age group (Section 4.5).

## 2.2 Secondary objectives

In addition, nine secondary objectives are investigated for adults. Depending on availability of the required data within the databases, these include for each event type:

- 1.1.1. To estimate RSV-attributable incidence of influenza or pneumonia events.
- 1.1.2. To estimate RSV-attributable incidence of bronchitis or bronchiolitis events.
- 1.1.3. To estimate RSV-attributable incidence of chronic lower respiratory disease events.
- 1.1.4. To estimate RSV-attributable incidence of upper respiratory disease events.
- 1.2.1. To estimate RSV-attributable incidence of chronic heart failure exacerbation events.
- 1.2.2. To estimate RSV-attributable incidence of ischemic heart disease events.
- 1.2.3. To estimate RSV-attributable incidence of arrhythmia events.
- 1.2.4. To estimate RSV-attributable incidence of cerebrovascular events.
- 1.2.5. To estimate RSV-attributable incidence of myocarditis events.

These objectives are assessed stratified by age group (Section 4.5).

# 3 STUDY DESIGN

---

The objectives are assessed through a retrospective analysis of healthcare data (Section 3.3). Data are analysed with a Quasi-Poisson model adjusting for seasonality and viral activity (Section 7.2).

## 3.1 Study population

Individuals (male or female) residing in Spain captured by the selected databases that are registered in national registries (Section 3.3) with one of the studied event types (Section 4.1).

## 3.2 Study period

Data are captured from 2015 until 2019, hence excluding 2020 (COVID-19 pandemic), which is expected to distort RSV surveillance and/or incidence.

## 3.3 Data sources

The study is conducted using healthcare data that are available online or reside in administrative databases with Pfizer Spain (Table 1).

Table 1. Characteristics of healthcare databases used in this study.

| Variable                       | Data source                                                                         | Description                          | Data owner                    | Coverage | Granularity |
|--------------------------------|-------------------------------------------------------------------------------------|--------------------------------------|-------------------------------|----------|-------------|
| Event type: hospitalization    | Conjunto Mínimo de Datos Básicos (CMBD) National                                    | National hospital discharge register | Ministry of Health            | National | Daily       |
| Event type: mortality          | Base de datos de mortalidad                                                         | National mortality register          | National Statistical Office   | National | Monthly     |
| Viral activity: RSV            | Vigilancia centinela de IRAs y de IRAG: Gripe, Covid-19 y otros virus respiratorios | National sentinel surveillance       | Instituto de Salud Carlos III | National | Weekly      |
| Viral activity: influenza      | Vigilancia centinela de IRAs y de IRAG: Gripe, Covid-19 y otros virus respiratorios | National sentinel surveillance       | Instituto de Salud Carlos III | National | Weekly      |
| Viral activity: RSV – HB       | Conjunto Mínimo de Datos Básicos (CMBD) National                                    | National hospital discharge register | Ministry of Health            | National | Daily       |
| Viral activity: influenza - HB | Conjunto Mínimo de Datos Básicos (CMBD) National                                    | National hospital discharge register | Ministry of Health            | National | Daily       |

RSV: Respiratory syncytial virus; HB: hospital-based.

The hospitalization data file, obtained from the national hospital discharge register, includes the following variables of interest for this study: hospital code (for 2015 only), patient code (within the hospital for 2015, across hospitals for 2016-2019), year, date of birth, gender, principal diagnosis, secondary diagnosis and date of admission.

The mortality data file, obtained from the national mortality register, includes the following variables of interest for this study: year and month of death, age (in years) and principal diagnosis (cause of death).

The surveillance data file, obtained by extracting surveillance data from the national sentinel surveillance, includes the following variables of interest for this study: ISO calendar week of testing, number of positive tests (for RSV or influenza), number of tests taken (for RSV or influenza).

## 4 OPERATIONAL DEFINITIONS

In this study, two event types are of interest (Section 4.1). They are assessed through a set of objectives (Section 2) revolving around a set of primary and secondary outcomes (Section 4.2). The analysis of these outcomes accounts for seasonality, viral proxies (Section 4.4) and other variables (Section 4.5).

### 4.1 Event types

The event types of interest in this study include hospitalization and mortality. A hospitalization (including at least one overnight stay at a hospital) is defined by the date of admission. Mortality is defined by the month and year of death.

For hospitalization, a readmission for the same outcome (Section 4.2) within 30 days from the preceding hospital admission is considered as part of the preceding hospitalization. When readmission occurs more than 30 days after the preceding hospitalization it is considered as an independent hospitalization.

### 4.2 Outcomes

The outcomes, primary and secondary, are defined by occurrence of selected ICD codes (9<sup>th</sup> revision before October 1, 2015, and 10<sup>th</sup> revision afterwards). For hospitalization, any mentioning of the selected

ICD codes qualifies a record as an event. For mortality, only the primary diagnosis is considered for event qualification.

#### 4.2.1 Primary outcomes

The main outcomes of interest for each event type in adults are cardiorespiratory events, respiratory events and circulatory events (Table 2). These outcomes have been selected based on a literature review to balance sensitivity and specificity of the ICD diagnosis for identification of RSV disease and to approximate estimates reported from observational studies. In children, the outcome of interest for each event type is respiratory events (Table 2).

Table 2. Definition of primary outcomes.

| Outcome                    | ICD-9-CM           | ICD-10-CM          |
|----------------------------|--------------------|--------------------|
| 1. Cardiorespiratory event | 460-519<br>390-459 | J00-J99<br>I00-I99 |
| 1.1 Respiratory event      | 460-519            | J00-J99            |
| 1.2 Circulatory event      | 390-459            | I00-I99            |

ICD: International Classification of Diseases.

Note that on October 1, 2015 the ICD codes changed from its 9<sup>th</sup> revision to its 10<sup>th</sup> revision. Therefore, depending on the study period, different ICD nomenclature is to be used for the classification of events.

#### 4.2.2 Secondary outcomes

In addition, nine secondary outcomes are of interest for each studied event type in adults (Table 3). These outcomes have been selected to give more detailed information relevant for use in economic evaluations.

Table 3. Definition of secondary outcomes.

| Outcome subcategory                      | ICD-10-CM                        | ICD-10-CM nomenclature                                                | ICD-9-CM                            | ICD-9-CM nomenclature                                                     |
|------------------------------------------|----------------------------------|-----------------------------------------------------------------------|-------------------------------------|---------------------------------------------------------------------------|
| 1.1.1 Influenza or pneumonia             | J09                              | Influenza due to identified zoonotic or pandemic influenza virus      | 488                                 | Influenza due to certain identified influenza viruses                     |
|                                          | J10                              | Influenza due to identified seasonal influenza virus                  | 487                                 | Influenza                                                                 |
|                                          | J11                              | Influenza, virus not identified                                       | **                                  |                                                                           |
|                                          | J12                              | Viral pneumonia, not elsewhere classified                             | 480                                 | Viral pneumonia                                                           |
|                                          | J13                              | Pneumonia due to Streptococcus pneumoniae                             | 481                                 | Pneumococcal pneumonia [Streptococcus pneumoniae pneumonia]               |
|                                          | J14                              | Pneumonia due to Hemophilus influenzae                                |                                     | 482.2 - Pneumonia due to hemophilus influenzae (h. influenzae)            |
|                                          | J15                              | Bacterial pneumonia, not elsewhere classified                         | 482                                 | Other bacterial pneumonia                                                 |
|                                          | J16                              | Pneumonia due to other infectious organisms, not elsewhere classified | 483                                 | Pneumonia due to other specified organism                                 |
|                                          | J17                              | Pneumonia in diseases classified elsewhere                            | 484                                 | Pneumonia in infectious diseases classified elsewhere                     |
|                                          | J18                              | Pneumonia, organism unspecified                                       | 486<br>485                          | Pneumonia, organism unspecified<br>Bronchopneumonia, organism unspecified |
| 1.1.2 Bronchitis or bronchiolitis        | J20                              | Acute bronchitis                                                      | 466                                 | Acute bronchitis and bronchiolitis                                        |
|                                          | J21                              | Acute bronchiolitis                                                   |                                     |                                                                           |
|                                          | J22                              | Unspecified acute lower respiratory infection                         | **                                  |                                                                           |
| 1.1.3 Chronic lower respiratory diseases | J40                              | Bronchitis, not specified as acute or chronic                         | 490                                 | Bronchitis, not specified as acute or chronic                             |
|                                          | J41                              | Simple and mucopurulent chronic bronchitis                            | 491                                 | Chronic bronchitis                                                        |
|                                          | J42                              | Unspecified chronic bronchitis                                        | **                                  |                                                                           |
|                                          | J43                              | Emphysema                                                             | 492                                 | Emphysema                                                                 |
|                                          | J44                              | Chronic obstructive pulmonary disease                                 | 496                                 | Chronic airway obstruction, not elsewhere classified                      |
|                                          | J45                              | Asthma                                                                | 493                                 | Asthma                                                                    |
|                                          | J46                              | Status asthmaticus                                                    | **                                  |                                                                           |
|                                          | J47                              | Bronchiectasis                                                        | 494                                 | Bronchiectasis                                                            |
|                                          | **                               |                                                                       | 495                                 | Extrinsic allergic alveolitis                                             |
|                                          | 1.1.4 Upper respiratory diseases | J00                                                                   | Acute nasopharyngitis [common cold] | 460                                                                       |
| J01                                      |                                  | Acute sinusitis                                                       | 461                                 | Acute sinusitis                                                           |
| J02                                      |                                  | Acute pharyngitis                                                     | 462                                 | Acute pharyngitis                                                         |
| J03                                      |                                  | Acute tonsillitis                                                     | 463                                 | Acute tonsillitis                                                         |
| J04                                      |                                  | Acute laryngitis and tracheitis                                       | 464                                 | Acute laryngitis and tracheitis                                           |
| J05                                      |                                  | Acute obstructive laryngitis [croup] and epiglottitis                 |                                     | 464.3 Epiglottitis<br>464.4 Croup                                         |

|                                           |                                |                                                                      |                                               |                                                                                                                                   |
|-------------------------------------------|--------------------------------|----------------------------------------------------------------------|-----------------------------------------------|-----------------------------------------------------------------------------------------------------------------------------------|
|                                           | J06                            | Acute upper respiratory infections of multiple and unspecified sites | 465                                           | Acute upper respiratory infections of multiple or unspecified sites                                                               |
|                                           | J30                            | Vasomotor and allergic rhinitis                                      | 477                                           | Allergic rhinitis                                                                                                                 |
|                                           | J31                            | Chronic rhinitis, nasopharyngitis and pharyngitis                    | 472                                           | Chronic pharyngitis and nasopharyngitis                                                                                           |
|                                           | J32                            | Chronic sinusitis                                                    | 473                                           | Chronic sinusitis                                                                                                                 |
|                                           | J33                            | Nasal polyp                                                          | 471                                           | Nasal polyps                                                                                                                      |
|                                           | J34                            | Other and unspecified disorders of nose and nasal sinuses            | 470                                           | Deviated nasal septum                                                                                                             |
|                                           | J35                            | Chronic diseases of tonsils and adenoids                             | 474                                           | Chronic disease of tonsils and adenoids                                                                                           |
|                                           | J36                            | Peritonsillar abscess                                                | 475                                           | Peritonsillar abscess                                                                                                             |
|                                           | J37                            | Chronic laryngitis and laryngotracheitis                             | 476                                           | Chronic laryngitis and laryngotracheitis                                                                                          |
|                                           | J38                            | Diseases of vocal cords and larynx, not elsewhere classified         | **                                            |                                                                                                                                   |
|                                           | J39                            | Other diseases of upper respiratory tract                            | 478                                           | Other diseases of upper respiratory tract                                                                                         |
| 1.2.1 Chronic heart failure exacerbations | I42                            | Cardiomyopathy                                                       | 425                                           | Cardiomyopathy                                                                                                                    |
|                                           | I43                            | Cardiomyopathy in diseases classified elsewhere                      |                                               | 425.8 Cardiomyopathy in other diseases classified elsewhere                                                                       |
|                                           | I50                            | Heart failure                                                        | 428                                           | Heart failure                                                                                                                     |
|                                           | I51.7                          | Cardiomegaly                                                         | 429.3                                         | Cardiomegaly                                                                                                                      |
| 1.2.2 Ischemic heart diseases             | I20                            | Angina pectoris                                                      | 413                                           | Angina pectoris                                                                                                                   |
|                                           | I21                            | Acute myocardial infarction                                          | 410                                           | Acute myocardial infarction                                                                                                       |
|                                           | I22                            | Subsequent myocardial infarction                                     | **                                            |                                                                                                                                   |
|                                           | I23                            | Certain current complications following acute myocardial infarction  | **                                            |                                                                                                                                   |
|                                           | I24                            | Other acute ischemic heart diseases                                  | 411                                           | Other acute and subacute forms of ischemic heart disease                                                                          |
|                                           |                                |                                                                      | 412                                           | Old myocardial infarct                                                                                                            |
| I25                                       | Chronic ischemic heart disease | 414                                                                  | Other forms of chronic ischemic heart disease |                                                                                                                                   |
|                                           |                                |                                                                      |                                               |                                                                                                                                   |
| 1.2.3 Arrhythmias                         | I44                            | Atrioventricular and left bundle-branch block,                       | 426                                           | Conduction disorders                                                                                                              |
|                                           | I45                            | Other conduction disorders                                           | 427                                           | Cardiac dysrhythmias                                                                                                              |
|                                           | I46                            | Cardiac arrest                                                       |                                               | 427.5 Cardiac arrest                                                                                                              |
|                                           | I47                            | Paroxysmal tachycardia                                               |                                               | 427.0 Paroxysmal supraventricular tachycardia, 427.1 Paroxysmal ventricular tachycardia, 427.2 Paroxysmal tachycardia unspecified |
|                                           |                                |                                                                      |                                               | 427.3 Atrial fibrillation and flutter                                                                                             |
|                                           | I49                            | Other cardiac arrhythmias                                            |                                               | 427.8 Other specified cardiac dysrhythmias                                                                                        |
| 1.2.4 Cerebrovascular diseases            | I60                            | Subarachnoid hemorrhage                                              | 430                                           | Subarachnoid haemorrhage                                                                                                          |
|                                           | I61                            | Intracerebral hemorrhage                                             | 431                                           | Intracerebral hemorrhage                                                                                                          |

|                   |       |                                                                                      |       |                                                          |
|-------------------|-------|--------------------------------------------------------------------------------------|-------|----------------------------------------------------------|
|                   | I62   | Other nontraumatic intracranial hemorrhage                                           | 432   | Other and unspecified intracranial hemorrhage            |
|                   | I63   | Cerebral infarction                                                                  | **    |                                                          |
|                   | I64   | Stroke, not specified as haemorrhage or infarction                                   | **    |                                                          |
|                   | I65   | Occlusion and stenosis of precerebral arteries, not resulting in cerebral infarction | 433   | Occlusion and stenosis of precerebral arteries           |
|                   | I66   | Occlusion and stenosis of cerebral arteries, not resulting in cerebral infarction    | 434   | Occlusion of cerebral arteries                           |
|                   | I67   | Other cerebrovascular diseases                                                       | 436   | Acute but ill-defined cerebrovascular disease            |
|                   | I68   | Cerebrovascular disorders in diseases classified elsewhere                           | 437   | Other and ill-defined cerebrovascular disease            |
|                   | **    |                                                                                      | 435   | Transient cerebral ischemia                              |
| 1.2.5 Myocarditis | I40   | Acute myocarditis                                                                    | 422   | Acute myocarditis                                        |
|                   | I41   | Myocarditis in diseases classified elsewhere                                         |       | 422.0 Acute myocarditis in diseases classified elsewhere |
|                   | I51.4 | Myocarditis, unspecified                                                             | 429.0 | Myocarditis, unspecified                                 |
|                   | I51.5 | Myocardial degeneration                                                              | 429.1 | Myocardial degeneration                                  |
|                   |       |                                                                                      |       |                                                          |

ICD: International Classification of Diseases.

Note that on October 1, 2015 the ICD codes changed from its 9<sup>th</sup> revision to its 10<sup>th</sup> revision. Therefore, depending on the study period, different ICD nomenclature is to be used for the classification of events.

In order to obtain the RSV-specific hospitalization and mortality rates, we extracted data provided in Table 4.

Table 4. RSV-specific data definition

|              |       |                                                                                   |        |                                                              |
|--------------|-------|-----------------------------------------------------------------------------------|--------|--------------------------------------------------------------|
| RSV specific | B97.4 | Respiratory syncytial virus as the cause of diseases classified to other chapters | 079.6  | Respiratory syncytial virus (RSV)                            |
|              | J21.0 | Acute bronchiolitis due to respiratory syncytial virus                            | 466.11 | Acute bronchiolitis due to respiratory syncytial virus (RSV) |
|              | J12.1 | Respiratory syncytial virus pneumonia                                             | 480.1  | Pneumonia due to respiratory syncytial virus                 |
|              | J20.5 | Acute bronchitis due to respiratory syncytial virus                               | **     | No equivalent                                                |

### 4.3 Alternative outcomes

An expert panel (in France) identified nine cardiac diagnoses as potentially associated with RSV: acute myocardial infarction, pulmonary embolism, acute pericarditis, acute myocarditis, myocarditis in disease classified elsewhere, atrial fibrillation and flutter, heart failure, cerebral infarction, and stroke, not specified as haemorrhage or infarction. To ensure these diagnoses were accounted for, several alternative definitions of cardiorespiratory hospitalizations will be included as a sensitivity analysis for adults (Table 5).

Table 5. Definition of alternative outcomes.

| Outcome                                    | Definition                                   |
|--------------------------------------------|----------------------------------------------|
| Selected cardiorespiratory hospitalization | ICD-10 codes: I21, I48-50, I63-64 and J00-99 |
| Combined cardiorespiratory hospitalization | Outcomes: 1.1, 1.2.1, 1.2.2, 1.2.3 and 1.2.4 |

ICD: International Classification of Diseases.

## 4.4 Viral proxies

Circulation of selected pathogens in the population can be accounted for by standardized surveillance-based viral proxies or by hospital-based viral proxies.

Surveillance-based viral proxies are defined as the weekly (or monthly) number of positive tests for a pathogen out of the total reported number of tests performed for the respective pathogen in the corresponding year. Note that the number of tests taken is only reported during influenza season.

Hospital-based viral proxies are defined as hospitalizations with a pathogen-specific ICD code in patients of a specific age (Table 6).

Table 6. Definition of hospital-based viral proxies.

| Viral proxy                  | Age       | ICD-9-CM                    | ICD-10-CM                         |
|------------------------------|-----------|-----------------------------|-----------------------------------|
| RSV – all models             | <2 years  | 079.6, 466.1, 466.11, 480.1 | B97.4, J21.0, J12.1, J20.5, J21.9 |
| Influenza – adult models     | ≥60 years | 487, 488                    | J09, J10, J11                     |
| Influenza – pediatric models | <2 years  | 487, 488                    | J09, J10, J11                     |

ICD: International Classification of Diseases.

Note that on October 1, 2015 the ICD codes changed from its 9<sup>th</sup> revision to its 10<sup>th</sup> revision. Therefore, depending on the study period, different ICD nomenclature is to be used for the classification of events.

Selected pathogens of interest in this study include RSV and influenza.

## 4.5 Other variables

Other variables of interest in this study include time and age.

The definition of time depends on the event type. For hospitalization, time is defined as running ISO calendar week (of hospital admission). For mortality, time is defined as running Gregorian calendar month (of death).

Age is defined as the age at the time of the event, categorized as one of four age groups of interest. The categorization of age depends on the event type. For hospitalization, age is categorized as 0-5 months, 6-11 months, 12-23 months, 2-5 years, 6-17 years, 18-49 years, 50-59 years, 60-79 years and ≥80 years. If the observed number of respiratory hospitalizations is too low (<5 in >20% of the weeks), age groups 12-23 months and 2-5 years are concatenated (1-5 years). For mortality, age is categorized as 0-11 months, 1-5 years, 6-17 years, 18-49 years, 50-59 years, 60-79 years and ≥80 years. If the observed number of



respiratory deaths is too low (<5 in >20% of the months), age groups 0-11 months and 1-5 years are concatenated (0-5 years).

## 5 SAMPLE SIZE CONSIDERATIONS

This is a descriptive study without any a priori hypothesis tests specified. As such, sample size calculations are not applicable.

## 6 DATA TRANSFORMATIONS

Initial data transformations are conducted on the hospitalization data file (Section 6.1), the mortality data file (Section 6.2) and the surveillance data file (Section 6.3), resulting in cleaned data files. Then, viral proxies based on the surveillance and the hospitalization data files are compared and one set is selected for use in the analysis (Section 6.4). Afterwards, the cleaned data files are merged together to obtain one analysis file for each event type (Section 6.5). This process is visualized in Figure 1 and elaborated in subsequent subsections.

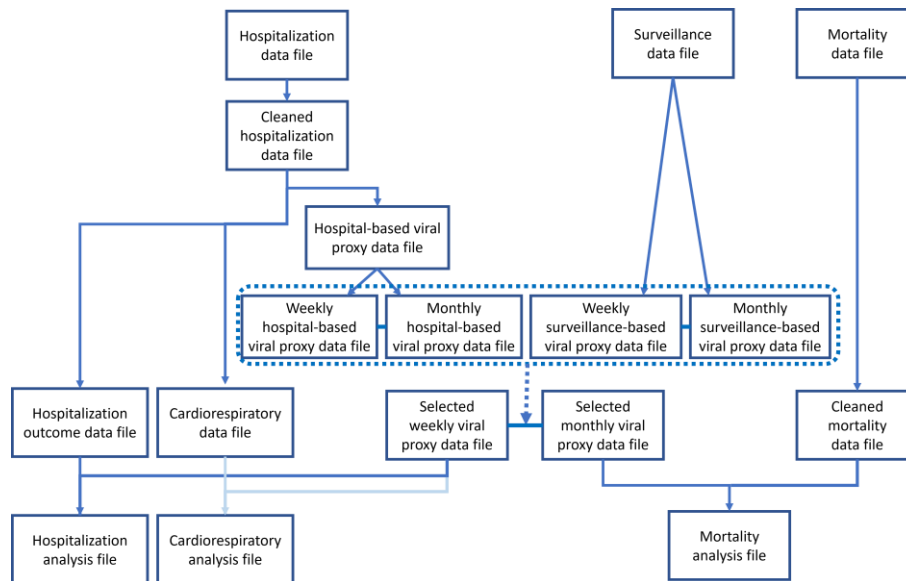

Figure 1. Visualization of data transformation process.

### 6.1 Hospitalization data file

Entries with admission dates outside of the study period or with identical admission and discharge dates (i.e. no overnight stay included) are dropped from the hospitalization data file. Afterwards, a unique patient ID is generated using the information available in the hospitalization data file. For 2015, the patient ID consists of a concatenation of hospital code, patient code and date of birth. For 2016-2019, the patient ID is represented by the National health system's patient identification number (CIP SNS). To avoid all entries with missing CIP SNS to be considered as one patient in analyses, a missing CIP SNS is

replaced by a substitute patient ID constructed from the information available in the data file (i.e. a concatenation of year, date of birth and gender).

Duplicate entries are removed from the hospitalization data file. For entries which differ only in diagnosis codes, the entry with the highest number of diagnosis codes is retained, assuming this is the most updated record. If only the diagnosis codes differ but the number of codes is equal, a random entry is retained. For entries which differ only in diagnosis codes and date of discharge, the entry with the latest discharge date is retained, assuming this is the most updated record.

For each of the remaining entries in the hospitalization data file, the presence of each of the studied outcomes and viral proxies is assessed based on the outcome and proxy definitions (Sections 4.2, 4.3 and 4.4). Age is determined as time between date of admission and date of birth in years (floored) or months (floored) when <1 year of age. Patients with age missing or date of birth reported as 1JAN1900 are dropped from the hospitalization data file. Afterwards, the patient's age is categorized in the study age groups (Section 4.5).

For each of the outcomes and hospital-based viral proxies, a similar approach is followed. Individual patients' records are sorted from the start of the study period to the end of the study period. For the records that are considered to be a readmission, the presence of the respective outcome or viral proxy during the preceding hospitalization and the time (in days) since this hospitalization are obtained. If readmission for the same outcome or proxy occurs within 30 days of the preceding hospitalization, only the initial hospitalization is retained (for the respective outcome or proxy).

The cleaned hospitalization data file is then used to generate three data files: the hospitalization outcome data file, the cardiorespiratory data file and the hospital-based viral proxy data file. The former are constructed by retaining the admission date, age group and outcomes, with the hospitalization outcome data file containing all outcomes (Section 4.2) and the cardiorespiratory data file containing all alternative outcomes (Section 4.3). The hospital-based viral proxy file is constructed by retaining the admission date, age and viral proxies.

### **6.1.1 Hospitalization outcome data file**

Time is determined as ISO calendar week and ISO calendar year from the date of hospital admission. The records for each outcome are aggregated to number of events per ISO week (within ISO year) for each age group.

A shell table showing the layout of the hospitalization outcome data file is shown in Annex Table A1. Because the first ISO week for 2015 spans dates in 2014, for which no hospitalization information is available, the timeline for the hospitalization data file runs from 2015 week 2 until 2019 week 52.

### **6.1.2 Cardiorespiratory data file**

Time is determined as ISO calendar week and ISO calendar year from the date of hospital admission. The records for each outcome are aggregated to number of events per ISO week (within ISO year) for each age group. Because alternative outcomes were ICD-10 coded, only entries for 2016 to 2019 are selected.

A shell table showing the layout of the cardiorespiratory data file is shown in Annex Table A2. The timeline for the cardiorespiratory data file runs from 2016 week 1 until 2019 week 52.

### 6.1.3 Hospital-based viral proxy data file

In the hospital-based viral proxy data file, three additional columns are created: a hospital-based RSV indicator and two hospital-based influenza indicators. The first identifies records for patients which are <2 years of age and hospitalized with RSV-specific ICD codes. The second identifies records for patients which are ≥60 years of age and hospitalized with influenza-specific ICD codes. The third identifies records for patients which are <2 years of age and hospitalized with influenza-specific ICD codes (Table 6).

Because information on viral proxies needs to match the aggregation level of the event data files (Sections 6.1.1 and 6.2), the hospital-based viral proxy data file is duplicated and data transformations are conducted on both files separately resulting in one weekly hospital-based viral proxy data file (Section 6.1.3.1) and one monthly hospital-based viral proxy data file (Section 6.1.3.2).

#### 6.1.3.1 Weekly hospital-based viral proxy data file

Time is determined as ISO calendar week and ISO calendar year from the date of hospital admission. The records for each indicator are aggregated to number of events per ISO week (within ISO year). Afterwards, four variables (for each indicator) reflecting the indicator levels in the week preceding the index week with 1, 2, 3 or 4 week(s) are appended to the weekly hospital-based viral proxy data file.

A shell table showing the layout of the resulting weekly hospital-based viral proxy data file is shown in Annex Table A3. To match available hospitalization information, the timeline for the data file runs from 2015 week 2 until 2019 week 52. Note however that complete lagged proxies (up to 4 weeks back) will only be available as of 2015 week 6.

#### 6.1.3.2 Monthly hospital-based viral proxy data file

Time is determined as Gregorian calendar month and Gregorian calendar year from the date of hospital admission. The records for each indicator are aggregated to number of events per Gregorian calendar month (within Gregorian calendar year).

A shell table showing the layout of the resulting monthly hospital-based viral proxy data file is shown in Annex Table A4. To match mortality information, the timeline for the data file runs from 2015 month 1 until 2019 month 12.

## 6.2 Mortality data file

For each individual patient record, the presence of each of the studied outcomes is assessed based on the outcome definitions (Section 4.2). The recorded age groups are categorized in the study age groups (Section 4.5). The records for each outcome are aggregated to number of events per month (within the year) for each age group.

A shell table showing the layout of the cleaned mortality data file is shown in Annex Table A5. The timeline for the mortality data file runs from 2015 month 1 until 2019 month 12.

## 6.3 Surveillance data file

For each pathogen, the number of positive tests in the aggregated off-season weeks (e.g., weeks 21-25) is evenly spread across the contained weeks to obtain weekly surveillance data. Once even spreading results in non-integer counts, the remaining number of positive tests is spread randomly across the contained weeks.

Because surveillance information needs to match the aggregation level of the event data files (Sections 6.1 and 6.2), the surveillance data file is duplicated and data transformations are conducted on both files separately resulting in one weekly surveillance data file (Section 6.3.1) and one monthly surveillance data file (Section 6.3.2).

### 6.3.1 Weekly surveillance-based viral proxy data file

For each pathogen, the reported number of samples tested is summed over the corresponding year. For each week, the number of samples testing positive for a pathogen is standardized by dividing by the total reported number of samples tested for the respective pathogen in the corresponding ISO calendar year. Afterwards, four variables (for each pathogen) reflecting the computed numbers in the week preceding the index week with 1, 2, 3 or 4 week(s) are appended to the weekly surveillance data file.

A shell table showing the layout of the cleaned weekly surveillance data file is shown in Annex Table A6. To match available hospitalization information, the timeline for the cleaned weekly surveillance data file runs from 2015 week 2 until 2019 week 52.

### 6.3.2 Monthly surveillance-based viral proxy data file

For each pathogen, the number of positive tests and the number of tests taken in the weeks (when available) is evenly spread across the contained seven days to achieve daily surveillance data for all pathogens of interest in this study. Once even spreading results in non-integer counts, the remaining number of positive tests is spread randomly across the contained days. Time indicators to map these daily surveillance data to the Gregorian calendar month and the Gregorian calendar year are deducted from the combination of the day of the week, the ISO calendar week and the ISO calendar year.

For each pathogen, the reported number of samples tested is summed over the corresponding year. For each month, the number of samples testing positive for a pathogen is summed and standardized by dividing by the total reported number of samples tested for the respective pathogen in the corresponding year.

A shell table showing the layout of the resulting surveillance datafile is shown in Annex Table A7. To match mortality information, the timeline for the cleaned monthly surveillance data file runs from 2015 month 1 until 2019 month 12.

## 6.4 Comparison of viral proxy data files

Two sources of viral proxy data, a national surveillance system and a hospital discharge register, are considered for generating analysis files (Section 6.5). While the surveillance-based viral proxy data are extracted from a tool that is well-known to the public for monitoring influenza surveillance, they are expected to be less stable when sampling practices are suboptimal. In order to compare, weekly hospital-based viral proxies and weekly surveillance-based viral proxies are plotted over running ISO

weeks. The proxy with less weekly fluctuation over time will be considered representative and coherent of the viral epidemic and therefore selected.

## 6.5 Generation of analysis files

After initial data transformations and comparisons, selected data files are merged to obtain one analysis file for each event type (Sections 6.5.1 and 6.5.3).

### 6.5.1 Hospitalization analysis file

The hospitalization outcome data file is merged with the selected weekly viral proxy data file on ISO week and year. For weeks in which no hospitalizations are reported for specific outcomes and/or age groups, zeros are entered to avoid gaps in the analysis timeline. Afterwards, weeks, each consisting of seven days, are sorted from the start to the end of the study period and a unique indicator variable showing running weeks is added to the analysis file. Note that the running week indicator starts from 2 instead of 1 to reflect the exclusion of 2015 ISO week 1 from the analysis. Because hospital-based viral proxies are not available as of 2015 week 6, analyses will run as of week 6 when the hospitalization analysis file was constructed using the hospital-based viral proxy data file and as of week 2 when the file was constructed using the surveillance-based viral proxy data file.

Consistency between 2015 and 2016-2019 hospitalization outcomes (Section 4.2) will be evaluated by plotting the observed events over time. In case of major inconsistencies between 2015, for which ICD-9 coding is used, and 2016-2019, for which ICD-10 coding is used, the first year of the hospitalization analysis file will be dropped.

### 6.5.2 Cardiorespiratory analysis file

The cardiorespiratory data file is merged with the selected weekly viral proxy data file on ISO week and year. For weeks in which no hospitalizations are reported for specific outcomes and/or age groups, zeros are entered to avoid gaps in the analysis timeline. Afterwards, weeks, each consisting of seven days, are sorted from the start to the end of the study period and a unique indicator variable showing running weeks is added to the analysis file.

Note that the timeline for this analysis file will follow the timeline of the cardiorespiratory analysis file, not the viral proxy data file.

### 6.5.3 Mortality analysis file

The cleaned mortality data file is merged with the selected monthly viral proxy data file on Gregorian calendar month and year. For months in which no deaths are reported for specific outcomes and/or age groups, zeros are entered to avoid gaps in the analysis timeline. Afterwards, months are sorted from the start to the end of the study period and a unique indicator variable showing running months is added to the analysis file.

# 7 STATISTICAL ANALYSIS

---

## 7.1 Descriptive analysis

Descriptive statistics are used to summarize the yearly number of events for each outcome (Section 4.2, within each event type (Section 4.1) and Section 4.3) stratified by age group (Annex Table A8 and Table A9). The number of tests taken and tests positive for each pathogen (Section 4.4) is summarized per year (Annex Table A10). The number of virus-specific hospitalizations (Section 4.4) is summarized per year (Annex Table A11).

Note that for hospitalization outcomes and pathogen surveillance, years reflect ISO years while for mortality outcomes, years reflect Gregorian calendar years.

## 7.2 Main analysis

There are different models that can be used to estimate the incidence of RSV. The statistical method most frequently used in recent literature was regression, which has the advantage that seasonal trends and cocirculation of other pathogens can be adjusted for [7]. Among regression models used in recent literature, the most frequently used outcome distribution was a Poisson distribution, which is recommended as the studied events generally occur according to a Poisson process. To account for expected overdispersion, a Quasi-Poisson distribution was selected for this study.

For each subgroup (one event type – one outcome – one age group), the observed number of events is plotted over time (Figure A1). For subgroups in which a trend can be observed (instead of random noise), a Quasi-Poisson regression model is used to model the number of events (Section 4.2) as a function of periodic time trends, aperiodic time trends and viral activity, while allowing for potential overdispersion. To reflect the most plausible biological link between viral circulation and the occurrence of events, the identity link function is used.

The periodic time trend, which reflects the seasonal variation in the weekly (or monthly) number of events, is represented by sine and cosine terms with weekly (or monthly) periodicity (period = 52.143, or 12, respectively)). The aperiodic time trend, which reflects subtle trends in the weekly (or monthly) number of events over time, is represented by a polynomial up to the 4th order.

Viral activity is represented by selected viral proxies for RSV and influenza (Section 6.4). To reflect delays between an increase in viral proxy detection (e.g., testing in children) and an increase in the weekly number of events (e.g., death in older adults), appropriate lags (0 to 4 weeks) are considered when incorporating the viral proxies into the model for weekly data.

The following general model for hospitalization is used:

$$Nr\_events_t \sim Poisson(\lambda_t, \theta)$$

$$\lambda_t = \beta_0 + \sum_{k=1}^4 \beta_k \cdot t^k + \beta_5 \cdot \sin\left(\frac{2\pi \cdot t}{52.143}\right) + \beta_6 \cdot \cos\left(\frac{2\pi \cdot t}{52.143}\right) + \beta_7 \cdot \sin\left(\frac{4\pi \cdot t}{52.143}\right) + \beta_8 \cdot \cos\left(\frac{4\pi \cdot t}{52.143}\right) + \sum_{l=1}^L \beta_{(8+l)} \cdot VP_{l(t-m_l)}$$

where  $\lambda_t$  is the expected number of events in week  $t$  with  $t$  representing the running week index in the study period, and  $\theta$  is the overdispersion parameter. Parameter  $\beta_0$  is the coefficient associated with the baseline number of events,  $\beta_1$  to  $\beta_4$  are coefficients associated with the aperiodic time trend,  $\beta_5$  to  $\beta_8$  are coefficients associated with the periodic time trend, and  $\beta_9$  to  $\beta_{(8+L)}$  are coefficients associated with appropriately lagged activity of pathogen  $VP_1$  to  $VP_L$ , with  $m_l = 0, 1, \dots, M$  reflecting the pathogen-specific time lag. All models use  $L = 2$  (RSV and influenza) and  $M = 4$ .

The following general model for mortality is used:

$$Nr\_events_t \sim Poisson(\lambda_t, \theta)$$

$$\lambda_t = \beta_0 + \sum_{k=1}^4 \beta_k \cdot t^k + \beta_5 \cdot \sin\left(\frac{2\pi \cdot t}{12}\right) + \beta_6 \cdot \cos\left(\frac{2\pi \cdot t}{12}\right) + \sum_{l=1}^L \beta_{(6+l)} \cdot VP_{l_t}$$

where  $\lambda_t$  is the expected number of events in month  $t$  with  $t$  representing the running month index in the study period, and parameters  $\theta$ , and  $\beta_0$  to  $\beta_6$  are defined as before. Parameters  $\beta_7$  to  $\beta_{(6+L)}$  are coefficients associated with activity of pathogen  $VP_1$  to  $VP_L$ , with  $L = 2$  (RSV and influenza).

For each subgroup, a final model is constructed using a step-by-step approach. First, a model containing only the periodic and aperiodic time trends is fitted, and the polynomial order is reduced when possible (significance level 0.05). Next, the model for the weekly data is expanded step-by-step. In each step, all possible lags of all pathogens not yet included in the model are considered for inclusion to the constructed model (one at a time), with the one with the highest test statistic selected for inclusion. By using the value of the test statistic in model selection instead of the p-value, priority is given to significant positive associations over non-significant positive associations, over non-significant negative associations, over significant negative associations. This process is followed as it is biologically implausible for the viral pathogens (RSV and influenza) to protect against hospitalization or death [8, 9]. This step is repeated, until all pathogens are included in the final model once.

General model fit of all final subgroup-specific models is inspected visually by plotting observed and model-based number of events over time (Annex Figure A2).

The weekly (or monthly) number of events (within the study period, Section 3.2) that are attributable to RSV is calculated as the difference between the total model-predicted number of events (using the final

model) and the model-predicted number of events under the hypothetical absence of RSV circulation (by setting the parameter associated with RSV to zero). The yearly age-specific number of RSV-attributable events is obtained by summing over the included years (Annex Table A12 and Table A13). Confidence intervals are obtained through residual bootstrapping.

The yearly proportion of RSV-attributable events, for each age group, is obtained by dividing the yearly number of RSV-attributable events by the yearly number of observed events.

Note that for hospitalization outcomes, years reflect ISO years while for mortality outcomes, years reflect Gregorian calendar years.

### 7.3 Extrapolation to population-level

Age-specific incidence rates of RSV-attributable events per year are obtained by dividing the yearly model-based age-specific number of RSV-attributable events by the age-specific population at risk of the event (from yearly July 1<sup>st</sup> national census data [10]). Incidence rates are obtained for each outcome, within each event type, and expressed as number of events per 100,000 person-years (Annex Table A14).

## 8 DISSEMINATION OF STUDY RESULTS

---

It is planned that two conference abstracts (one for adults and one for children) and one peer-reviewed manuscript (covering adults and children) will result from this study.

In the event of any prohibition or restriction imposed (e.g., clinical hold) by an applicable competent authority in any area of the world, or if the investigator party responsible for collecting data from the participant is aware of any new information which might influence the evaluation of the benefits and risks of a Pfizer product, Pfizer should be informed immediately.

## 9 SOFTWARE

---

All data management will be conducted in SAS version 9.4 or later, or R version 4.1.2 or later. All statistical analysis, including double programming, will be conducted in R version 4.1.2 or later.

## 10 LIMITATIONS

---

The selected approach shows some limitations which are mainly linked to the data sources. For example, when obtaining data from a hospital, the fixed number of beds may affect the hospitalization rates. In this same scenario there may also be inaccuracy in laboratory reports indicating RSV circulation [11]. Working with administrative data comes with the risk of both over- and underestimating the actual number of events, with overestimation resulting from e.g., ICD codes printed as rule-out diagnosis, and underestimation resulting from e.g., involuntary omission of ICD codes.



The hospitalization data used in this study hold the additional limitation that a unique patient identifier is not always provided. In the absence of a unique identifier, the remainder of the patient identifying data (e.g. date of birth, gender, ...) can be used to construct an artificial patient identifier. Although this remedial measure is required to proceed with the study as outlined in this SAP, it comes with the risk of underestimating the number of events when the patient identifying data is unable to uniquely identify each patient. The models used to estimate RSV-attributable number of events include viral proxies for RSV and influenza, which implicitly assumes that these are the only two pathogens that show a relevant association with the outcome of interest. If relevant associations between other, currently not included, pathogens and the outcome of interest come to light for which robust time series data are available, they could be accounted for in the model through viral proxies (as for RSV and influenza). However, even without explicitly modelling these potentially relevant pathogens, they would to a great extent be indirectly accounted for in the proposed model through the periodic component and the overdispersion parameter.

These limitations should be taken into consideration when interpreting results obtained from conducting the study described in this SAP.

## **11 QUALITY CONTROL**

---

The hospital and mortality registries and surveillance data will be verified and validated accordingly to reliability. When potential quality risks are identified, the corrective measures will be applied through hard coding. The cleaned data will be retained prior to analysis in accordance with Spain's regulatory authority's retention policy. The data will be securely stored. Before the results obtained from analysing the data are released, the analytical scripts will undergo quality control (double programming), which will be documented and retained.

## **12 ETHICAL CONSIDERATIONS**

---

As this study involves anonymized structured data, which according to applicable legal requirements do not contain data subject to privacy laws, obtaining informed consent from patients is not required.

The study will be conducted in accordance with legal and regulatory requirements, as well as with scientific purpose, value and rigor and follow generally accepted research practices described in the Good Epidemiological Practice guidelines issued by the International Epidemiological Association.

## REFERENCES

---

1. UK Health Security Agency, *Respiratory syncytial virus*, in *The green book*. 2013.
2. Hall, C., *The burgeoning burden of respiratory syncytial virus among children*. *Infect Disord Drug Targets*, 2012. **12**(2): p. 92-7.
3. Shi, T., et al., *Global Disease Burden Estimates of Respiratory Syncytial Virus-Associated Acute Respiratory Infection in Older Adults in 2015: A Systematic Review and Meta-Analysis*. *J Infect Dis*, 2020. **222**(Suppl 7): p. S577-83.
4. Falsey, A., et al., *Respiratory syncytial virus and other respiratory viral infections in older adults with moderate to severe influenza-like illness*. *J Infect Dis*, 2014. **209**(12): p. 1873-81.
5. Fleming, D., et al., *Modelling estimates of the burden of Respiratory Syncytial virus infection in adults and the elderly in the United Kingdom*. *BMC Infect Dis*, 2015. **15**(1): p. 443.
6. Zheng, Z., et al., *Estimated Incidence of Respiratory Hospitalizations Attributable to RSV Infections across Age and Socioeconomic Groups*. medRxiv 2022. **03.23.22272830**.
7. Mullooly, J., et al., *Influenza- and RSV-associated hospitalizations among adults*. *Vaccine* 2007. **25**(5): p. 846-55.
8. Sharpt, A., et al., *Estimating the burden of adult hospital admissions due to RSV and other respiratory pathogens in England*. *Influenza Other Respi Viruses*, 2022. **16**: p. 125-131.
9. van Asten, L., et al., *Mortality attributable to 9 common infections: significant effect of influenza A, respiratory syncytial virus, influenza B, norovirus, and parainfluenza in elderly persons*. *J Infect Dis*, 2012. **206**: p. 628-39.
10. Instituto Nacional de Estadística. *Población residente por fecha, sexo y edad*. 2022 [cited 2022 14/09]; Available from: <https://www.ine.es/jaxiT3/Tabla.htm?t=31304>.
11. Mangtani, P., et al., *The association of respiratory syncytial virus infection and influenza with emergency admissions for respiratory disease in London: an analysis of routine surveillance data*. *Clin Infect Dis*, 2006. **42**(5): p. 640-6.

## **ANNEXES**

---

| Year | Week | Age group    | Primary outcome: number of events |                        |                        | Secondary outcome: number of events |                                    |                                          |                                  |                                           |                               |                   |                        |                    |
|------|------|--------------|-----------------------------------|------------------------|------------------------|-------------------------------------|------------------------------------|------------------------------------------|----------------------------------|-------------------------------------------|-------------------------------|-------------------|------------------------|--------------------|
|      |      |              | All cardio-respiratory events     | All respiratory events | All circulatory events | Influenza or Pneumonia events       | Bronchitis or bronchiolitis events | chronic lower respiratory disease events | Upper respiratory disease events | Chronic heart failure exacerbation events | Ischemic heart disease events | Arrhythmia events | cerebrovascular events | Myocarditis events |
| 2015 | 2    | 0-5 months   | NA                                |                        | NA                     | NA                                  | NA                                 | NA                                       | NA                               | NA                                        | NA                            | NA                | NA                     | NA                 |
| 2015 | 2    | 6-11 months  | NA                                |                        | NA                     | NA                                  | NA                                 | NA                                       | NA                               | NA                                        | NA                            | NA                | NA                     | NA                 |
| 2015 | 2    | 12-23 months | NA                                |                        | NA                     | NA                                  | NA                                 | NA                                       | NA                               | NA                                        | NA                            | NA                | NA                     | NA                 |
| 2015 | 2    | 2-5 years    | NA                                |                        | NA                     | NA                                  | NA                                 | NA                                       | NA                               | NA                                        | NA                            | NA                | NA                     | NA                 |
| 2015 | 2    | 6-17 years   | NA                                |                        | NA                     | NA                                  | NA                                 | NA                                       | NA                               | NA                                        | NA                            | NA                | NA                     | NA                 |
| 2015 | 2    | 18-49 years  |                                   |                        |                        |                                     |                                    |                                          |                                  |                                           |                               |                   |                        |                    |
| 2015 | 2    | 50-59 years  |                                   |                        |                        |                                     |                                    |                                          |                                  |                                           |                               |                   |                        |                    |
| 2015 | 2    | 60-79 years  |                                   |                        |                        |                                     |                                    |                                          |                                  |                                           |                               |                   |                        |                    |
| 2015 | 2    | >=80 years   |                                   |                        |                        |                                     |                                    |                                          |                                  |                                           |                               |                   |                        |                    |
| 2015 | 3    | 0-5 months   | NA                                |                        | NA                     | NA                                  | NA                                 | NA                                       | NA                               | NA                                        | NA                            | NA                | NA                     | NA                 |
| 2015 | 3    | 6-11 months  | NA                                |                        | NA                     | NA                                  | NA                                 | NA                                       | NA                               | NA                                        | NA                            | NA                | NA                     | NA                 |
| 2015 | 3    | 12-23 months | NA                                |                        | NA                     | NA                                  | NA                                 | NA                                       | NA                               | NA                                        | NA                            | NA                | NA                     | NA                 |
| 2015 | 3    | 2-5 years    | NA                                |                        | NA                     | NA                                  | NA                                 | NA                                       | NA                               | NA                                        | NA                            | NA                | NA                     | NA                 |
| 2015 | 3    | 6-17 years   | NA                                |                        | NA                     | NA                                  | NA                                 | NA                                       | NA                               | NA                                        | NA                            | NA                | NA                     | NA                 |
| 2015 | 3    | 18-49 years  |                                   |                        |                        |                                     |                                    |                                          |                                  |                                           |                               |                   |                        |                    |
| 2015 | 3    | 50-59 years  |                                   |                        |                        |                                     |                                    |                                          |                                  |                                           |                               |                   |                        |                    |
| 2015 | 3    | 60-79 years  |                                   |                        |                        |                                     |                                    |                                          |                                  |                                           |                               |                   |                        |                    |
| 2015 | 3    | >=80 years   |                                   |                        |                        |                                     |                                    |                                          |                                  |                                           |                               |                   |                        |                    |
| ...  | ...  | ...          |                                   |                        |                        |                                     |                                    |                                          |                                  |                                           |                               |                   |                        |                    |
| ...  | ...  | ...          |                                   |                        |                        |                                     |                                    |                                          |                                  |                                           |                               |                   |                        |                    |
| 2019 | 52   | 0-5 months   | NA                                |                        | NA                     | NA                                  | NA                                 | NA                                       | NA                               | NA                                        | NA                            | NA                | NA                     | NA                 |
| 2019 | 52   | 6-11 months  | NA                                |                        | NA                     | NA                                  | NA                                 | NA                                       | NA                               | NA                                        | NA                            | NA                | NA                     | NA                 |
| 2019 | 52   | 12-23 months | NA                                |                        | NA                     | NA                                  | NA                                 | NA                                       | NA                               | NA                                        | NA                            | NA                | NA                     | NA                 |
| 2019 | 52   | 2-5 years    | NA                                |                        | NA                     | NA                                  | NA                                 | NA                                       | NA                               | NA                                        | NA                            | NA                | NA                     | NA                 |
| 2019 | 52   | 6-17 years   | NA                                |                        | NA                     | NA                                  | NA                                 | NA                                       | NA                               | NA                                        | NA                            | NA                | NA                     | NA                 |
| 2019 | 52   | 18-49 years  |                                   |                        |                        |                                     |                                    |                                          |                                  |                                           |                               |                   |                        |                    |
| 2019 | 52   | 50-59 years  |                                   |                        |                        |                                     |                                    |                                          |                                  |                                           |                               |                   |                        |                    |
| 2019 | 52   | 60-79 years  |                                   |                        |                        |                                     |                                    |                                          |                                  |                                           |                               |                   |                        |                    |
| 2019 | 52   | >=80 years   |                                   |                        |                        |                                     |                                    |                                          |                                  |                                           |                               |                   |                        |                    |

Table A1. Shell table for the hospitalization outcome data file.

| Year | Week | Age group   | Selected cardiorespiratory hospitalizations | Combined cardiorespiratory hospitalizations |
|------|------|-------------|---------------------------------------------|---------------------------------------------|
| 2016 | 1    | 18-49 years |                                             |                                             |
| 2016 | 1    | 50-59 years |                                             |                                             |
| 2016 | 1    | 60-79 years |                                             |                                             |
| 2016 | 1    | >=80 years  |                                             |                                             |
| 2016 | 2    | 18-49 years |                                             |                                             |
| 2016 | 2    | 50-59 years |                                             |                                             |
| 2016 | 2    | 60-79 years |                                             |                                             |
| 2016 | 2    | >=80 years  |                                             |                                             |
| ...  | ...  | ...         |                                             |                                             |
| ...  | ...  | ...         |                                             |                                             |
| 2019 | 52   | 18-49 years |                                             |                                             |
| 2019 | 52   | 50-59 years |                                             |                                             |
| 2019 | 52   | 60-79 years |                                             |                                             |
| 2019 | 52   | >=80 years  |                                             |                                             |

*Table A2. Shell table for the cardiorespiratory data file.*

| Year | Week | Hospitalizations for |                       |                      | Lagged (1 week) hospitalizations for |                       |                      | Lagged (2 weeks) hospitalizations for |                       |                      | Lagged (3 weeks) hospitalizations for |                       |                      | Lagged (4 weeks) hospitalizations for |                       |                      |
|------|------|----------------------|-----------------------|----------------------|--------------------------------------|-----------------------|----------------------|---------------------------------------|-----------------------|----------------------|---------------------------------------|-----------------------|----------------------|---------------------------------------|-----------------------|----------------------|
|      |      | RSV                  | Influenza (≥60 years) | Influenza (<2 years) | RSV                                  | Influenza (≥60 years) | Influenza (<2 years) | RSV                                   | Influenza (≥60 years) | Influenza (<2 years) | RSV                                   | Influenza (≥60 years) | Influenza (<2 years) | RSV                                   | Influenza (≥60 years) | Influenza (<2 years) |
| 2015 | 2    |                      |                       |                      | NA                                   | NA                    | NA                   | NA                                    | NA                    | NA                   | NA                                    | NA                    | NA                   | NA                                    | NA                    | NA                   |
| 2015 | 3    |                      |                       |                      |                                      |                       |                      | NA                                    | NA                    | NA                   | NA                                    | NA                    | NA                   | NA                                    | NA                    | NA                   |
| 2015 | 4    |                      |                       |                      |                                      |                       |                      |                                       |                       |                      | NA                                    | NA                    | NA                   | NA                                    | NA                    | NA                   |
| 2015 | 5    |                      |                       |                      |                                      |                       |                      |                                       |                       |                      |                                       |                       |                      | NA                                    | NA                    | NA                   |
| 2015 | 6    |                      |                       |                      |                                      |                       |                      |                                       |                       |                      |                                       |                       |                      |                                       |                       |                      |
| ...  | ...  |                      |                       |                      |                                      |                       |                      |                                       |                       |                      |                                       |                       |                      |                                       |                       |                      |
| ...  | ...  |                      |                       |                      |                                      |                       |                      |                                       |                       |                      |                                       |                       |                      |                                       |                       |                      |
| 2019 | 52   |                      |                       |                      |                                      |                       |                      |                                       |                       |                      |                                       |                       |                      |                                       |                       |                      |

Table A3. Shell table for the weekly hospital-based viral proxy data file.  
RSV: respiratory syncytial virus; NA: not available

| Year | Month | Number of hospitalizations for |                       |                      |
|------|-------|--------------------------------|-----------------------|----------------------|
|      |       | RSV                            | Influenza (≥60 years) | Influenza (<2 years) |
| 2015 | 1     |                                |                       |                      |
| 2015 | 2     |                                |                       |                      |
| 2015 | 3     |                                |                       |                      |
| .... | ....  |                                |                       |                      |
| .... | ....  |                                |                       |                      |
| 2019 | 12    |                                |                       |                      |

Table A4. Shell table for the monthly hospital-based viral proxy data file.  
RSV: respiratory syncytial virus.

| Year | Month | Age group    | Primary outcome: number of events |                        |                        | Secondary outcome: number of events |                                    |                                          |                                  |                                           |                               |                   |                        |                    |
|------|-------|--------------|-----------------------------------|------------------------|------------------------|-------------------------------------|------------------------------------|------------------------------------------|----------------------------------|-------------------------------------------|-------------------------------|-------------------|------------------------|--------------------|
|      |       |              | All cardio-respiratory events     | All respiratory events | All circulatory events | Influenza or Pneumonia events       | Bronchitis or bronchiolitis events | chronic lower respiratory disease events | Upper respiratory disease events | Chronic heart failure exacerbation events | Ischemic heart disease events | Arrhythmia events | cerebrovascular events | Myocarditis events |
| 2015 | 1     | 0-5 months   | NA                                |                        | NA                     | NA                                  | NA                                 | NA                                       | NA                               | NA                                        | NA                            | NA                | NA                     | NA                 |
| 2015 | 1     | 6-11 months  | NA                                |                        | NA                     | NA                                  | NA                                 | NA                                       | NA                               | NA                                        | NA                            | NA                | NA                     | NA                 |
| 2015 | 1     | 12-23 months | NA                                |                        | NA                     | NA                                  | NA                                 | NA                                       | NA                               | NA                                        | NA                            | NA                | NA                     | NA                 |
| 2015 | 1     | 2-5 years    | NA                                |                        | NA                     | NA                                  | NA                                 | NA                                       | NA                               | NA                                        | NA                            | NA                | NA                     | NA                 |
| 2015 | 1     | 6-17 years   | NA                                |                        | NA                     | NA                                  | NA                                 | NA                                       | NA                               | NA                                        | NA                            | NA                | NA                     | NA                 |
| 2015 | 1     | 18-49 years  |                                   |                        |                        |                                     |                                    |                                          |                                  |                                           |                               |                   |                        |                    |
| 2015 | 1     | 50-59 years  |                                   |                        |                        |                                     |                                    |                                          |                                  |                                           |                               |                   |                        |                    |
| 2015 | 1     | 60-79 years  |                                   |                        |                        |                                     |                                    |                                          |                                  |                                           |                               |                   |                        |                    |
| 2015 | 1     | >=80 years   |                                   |                        |                        |                                     |                                    |                                          |                                  |                                           |                               |                   |                        |                    |
| 2015 | 2     | 0-5 months   | NA                                |                        | NA                     | NA                                  | NA                                 | NA                                       | NA                               | NA                                        | NA                            | NA                | NA                     | NA                 |
| 2015 | 2     | 6-11 months  | NA                                |                        | NA                     | NA                                  | NA                                 | NA                                       | NA                               | NA                                        | NA                            | NA                | NA                     | NA                 |
| 2015 | 2     | 12-23 months | NA                                |                        | NA                     | NA                                  | NA                                 | NA                                       | NA                               | NA                                        | NA                            | NA                | NA                     | NA                 |
| 2015 | 2     | 2-5 years    | NA                                |                        | NA                     | NA                                  | NA                                 | NA                                       | NA                               | NA                                        | NA                            | NA                | NA                     | NA                 |
| 2015 | 2     | 6-17 years   | NA                                |                        | NA                     | NA                                  | NA                                 | NA                                       | NA                               | NA                                        | NA                            | NA                | NA                     | NA                 |
| 2015 | 2     | 18-49 years  |                                   |                        |                        |                                     |                                    |                                          |                                  |                                           |                               |                   |                        |                    |
| 2015 | 2     | 50-59 years  |                                   |                        |                        |                                     |                                    |                                          |                                  |                                           |                               |                   |                        |                    |
| 2015 | 2     | 60-79 years  |                                   |                        |                        |                                     |                                    |                                          |                                  |                                           |                               |                   |                        |                    |
| 2015 | 2     | >=80 years   |                                   |                        |                        |                                     |                                    |                                          |                                  |                                           |                               |                   |                        |                    |
| ...  | ...   | ....         |                                   |                        |                        |                                     |                                    |                                          |                                  |                                           |                               |                   |                        |                    |
| ...  | ...   | ....         |                                   |                        |                        |                                     |                                    |                                          |                                  |                                           |                               |                   |                        |                    |
| 2019 | 12    | 0-5 months   | NA                                |                        | NA                     | NA                                  | NA                                 | NA                                       | NA                               | NA                                        | NA                            | NA                | NA                     | NA                 |
| 2019 | 12    | 6-11 months  | NA                                |                        | NA                     | NA                                  | NA                                 | NA                                       | NA                               | NA                                        | NA                            | NA                | NA                     | NA                 |
| 2019 | 12    | 12-23 months | NA                                |                        | NA                     | NA                                  | NA                                 | NA                                       | NA                               | NA                                        | NA                            | NA                | NA                     | NA                 |
| 2019 | 12    | 2-5 years    | NA                                |                        | NA                     | NA                                  | NA                                 | NA                                       | NA                               | NA                                        | NA                            | NA                | NA                     | NA                 |
| 2019 | 12    | 6-17 years   | NA                                |                        | NA                     | NA                                  | NA                                 | NA                                       | NA                               | NA                                        | NA                            | NA                | NA                     | NA                 |
| 2019 | 12    | 18-49 years  |                                   |                        |                        |                                     |                                    |                                          |                                  |                                           |                               |                   |                        |                    |
| 2019 | 12    | 50-59 years  |                                   |                        |                        |                                     |                                    |                                          |                                  |                                           |                               |                   |                        |                    |
| 2019 | 12    | 60-79 years  |                                   |                        |                        |                                     |                                    |                                          |                                  |                                           |                               |                   |                        |                    |
| 2019 | 12    | >=80 years   |                                   |                        |                        |                                     |                                    |                                          |                                  |                                           |                               |                   |                        |                    |

Table A5. Shell table for the cleaned mortality data file.

| Year | Week | Number of tests positive for |           | Standardized number of positive tests for |           | Lagged (1 week) standardized number of positive tests for |           | Lagged (2 weeks) standardized number of positive tests for |           | Lagged (3 weeks) standardized number of positive tests for |           | Lagged (4 weeks) standardized number of positive tests for |           |
|------|------|------------------------------|-----------|-------------------------------------------|-----------|-----------------------------------------------------------|-----------|------------------------------------------------------------|-----------|------------------------------------------------------------|-----------|------------------------------------------------------------|-----------|
|      |      | RSV                          | Influenza | RSV                                       | Influenza | RSV                                                       | Influenza | RSV                                                        | Influenza | RSV                                                        | Influenza | RSV                                                        | Influenza |
| 2015 | 2    |                              |           |                                           |           |                                                           |           |                                                            |           |                                                            |           |                                                            |           |
| 2015 | 3    |                              |           |                                           |           |                                                           |           |                                                            |           |                                                            |           |                                                            |           |
| 2015 | 4    |                              |           |                                           |           |                                                           |           |                                                            |           |                                                            |           |                                                            |           |
| .... | .... |                              |           |                                           |           |                                                           |           |                                                            |           |                                                            |           |                                                            |           |
| .... | .... |                              |           |                                           |           |                                                           |           |                                                            |           |                                                            |           |                                                            |           |
| 2019 | 52   |                              |           |                                           |           |                                                           |           |                                                            |           |                                                            |           |                                                            |           |

Table A6. Shell table for the weekly surveillance-based viral proxy data file.  
RSV: respiratory syncytial virus.

| Year | Month | Number of tests positive for |           | Standardized number of positive tests for |           |
|------|-------|------------------------------|-----------|-------------------------------------------|-----------|
|      |       | RSV                          | Influenza | RSV                                       | Influenza |
| 2015 | 1     |                              |           |                                           |           |
| 2015 | 2     |                              |           |                                           |           |
| 2015 | 3     |                              |           |                                           |           |
| .... | ....  |                              |           |                                           |           |
| .... | ....  |                              |           |                                           |           |
| 2019 | 12    |                              |           |                                           |           |

Table A7. Shell table for the monthly surveillance-based viral proxy data file.  
RSV: respiratory syncytial virus.



| Year              | Hospitalization |             |             |           | Mortality <sup>c</sup> |             |             |           |
|-------------------|-----------------|-------------|-------------|-----------|------------------------|-------------|-------------|-----------|
|                   | 18-49 years     | 50-59 years | 60-79 years | ≥80 years | 18-49 years            | 50-59 years | 60-79 years | ≥80 years |
| 2015 <sup>b</sup> |                 |             |             |           |                        |             |             |           |
| 2016              |                 |             |             |           |                        |             |             |           |
| 2017              |                 |             |             |           |                        |             |             |           |
| 2018              |                 |             |             |           |                        |             |             |           |
| 2019              |                 |             |             |           |                        |             |             |           |

Table A8. Number of events<sup>a</sup> reported for adults in Spain, 2015-2019<sup>b</sup>.

<sup>a</sup> events refers to one outcome per table.

List of outcomes: cardiorespiratory events, respiratory events, circulatory events, influenza or pneumonia, bronchitis or bronchiolitis, chronic lower respiratory disease, upper respiratory disease, chronic heart failure exacerbation, ischemic heart disease, arrhythmia, cerebrovascular disease, or myocarditis, and alternative outcomes: selected cardiorespiratory hospitalizations combined cardiorespiratory hospitalizations.

<sup>b</sup> For alternative outcomes, the year 2015 will not be included.

<sup>c</sup> For alternative outcomes, mortality will not be included.

| Year | Hospitalization |             |              |           |            | Mortality   |           |            |
|------|-----------------|-------------|--------------|-----------|------------|-------------|-----------|------------|
|      | 0-5 months      | 6-11 months | 12-23 months | 2-5 years | 6-17 years | 0-11 months | 1-5 years | 6-17 years |
| 2015 |                 |             |              |           |            |             |           |            |
| 2016 |                 |             |              |           |            |             |           |            |
| 2017 |                 |             |              |           |            |             |           |            |
| 2018 |                 |             |              |           |            |             |           |            |
| 2019 |                 |             |              |           |            |             |           |            |

Table A9. Number of respiratory events reported for children in Spain, 2015-2019.

| Year | Number of isolates          |          |           |          |
|------|-----------------------------|----------|-----------|----------|
|      | Respiratory syncytial virus |          | Influenza |          |
|      | Tested                      | Positive | Tested    | Positive |
| 2015 |                             |          |           |          |
| 2016 |                             |          |           |          |
| 2017 |                             |          |           |          |
| 2018 |                             |          |           |          |
| 2019 |                             |          |           |          |

*Table A10. Annual pathogen surveillance in Spain, 2015-2019.*

| Year | Respiratory syncytial virus | Influenza (≥60 years) | Influenza (<2 years) |
|------|-----------------------------|-----------------------|----------------------|
| 2015 |                             |                       |                      |
| 2016 |                             |                       |                      |
| 2017 |                             |                       |                      |
| 2018 |                             |                       |                      |
| 2019 |                             |                       |                      |

*Table A11. Annual virus-specific hospitalizations in Spain, 2015-2019.*

| Year              | Hospitalization |             |             |           | Mortality <sup>c</sup> |             |             |           |
|-------------------|-----------------|-------------|-------------|-----------|------------------------|-------------|-------------|-----------|
|                   | 18-49 years     | 50-59 years | 60-79 years | ≥80 years | 18-49 years            | 50-59 years | 60-79 years | ≥80 years |
| 2015 <sup>b</sup> |                 |             |             |           |                        |             |             |           |
| 2016              |                 |             |             |           |                        |             |             |           |
| 2017              |                 |             |             |           |                        |             |             |           |
| 2018              |                 |             |             |           |                        |             |             |           |
| 2019              |                 |             |             |           |                        |             |             |           |

Table A12. Number of RSV-attributable events<sup>a</sup> for adults in Spain, 2015-2019<sup>b</sup>.

<sup>a</sup> events refers to one outcome per table.

List of outcomes: cardiorespiratory events, respiratory events, circulatory events, influenza or pneumonia, bronchitis or bronchiolitis, chronic lower respiratory disease, upper respiratory disease, chronic heart failure exacerbation, ischemic heart disease, arrhythmia, cerebrovascular disease, or myocarditis, and alternative outcomes: selected cardiorespiratory hospitalizations combined cardiorespiratory hospitalizations.

<sup>b</sup> For hospitalization outcomes, the year 2015 will be included only when the number of observed events is consistently reported in 2015 versus 2016-2019. For alternative outcomes, the year 2015 will not be included.

<sup>c</sup> For alternative outcomes, mortality will not be included.

| Year              | Hospitalization |             |                           |                        | 6-17 years | Mortality                |                        |            |
|-------------------|-----------------|-------------|---------------------------|------------------------|------------|--------------------------|------------------------|------------|
|                   | 0-5 months      | 6-11 months | 12-23 months <sup>a</sup> | 2-5 years <sup>a</sup> |            | 0-11 months <sup>b</sup> | 1-5 years <sup>b</sup> | 6-17 years |
| 2015 <sup>c</sup> |                 |             |                           |                        |            |                          |                        |            |
| 2016              |                 |             |                           |                        |            |                          |                        |            |
| 2017              |                 |             |                           |                        |            |                          |                        |            |
| 2018              |                 |             |                           |                        |            |                          |                        |            |
| 2019              |                 |             |                           |                        |            |                          |                        |            |

Table A13. Number of RSV-attributable respiratory events for children in Spain, 2015-2019<sup>c</sup>.

<sup>a</sup> To be replaced by the concatenated age group 1-5 years if observed respiratory hospitalizations are <5 in >20% of the weeks.

<sup>b</sup> To be replaced by the concatenated age group 0-5 years if observed respiratory deaths are <5 in >20% of the months.

<sup>c</sup> For hospitalization, the year 2015 will be included only when the number of observed events is consistently reported in 2015 versus 2016-2019.

| Year              | Hospitalization |             |             |           |                       | Mortality <sup>d</sup> |             |             |           |                       |
|-------------------|-----------------|-------------|-------------|-----------|-----------------------|------------------------|-------------|-------------|-----------|-----------------------|
|                   | 18-49 years     | 50-59 years | 60-79 years | ≥80 years | All ages <sup>a</sup> | 18-49 years            | 50-59 years | 60-79 years | ≥80 years | All ages <sup>a</sup> |
| 2015 <sup>c</sup> |                 |             |             |           |                       |                        |             |             |           |                       |
| 2016              |                 |             |             |           |                       |                        |             |             |           |                       |
| 2017              |                 |             |             |           |                       |                        |             |             |           |                       |
| 2018              |                 |             |             |           |                       |                        |             |             |           |                       |
| 2019              |                 |             |             |           |                       |                        |             |             |           |                       |

Table A14. Incidence of RSV-attributable events<sup>b</sup> for adults in Spain, 2015-2019<sup>c</sup>.

<sup>a</sup> standardized with January 1, 2022 census population figures for each age group.

<sup>b</sup> events refers to one outcome per table.

List of outcomes: cardiorespiratory events, respiratory events, circulatory events, influenza or pneumonia, bronchitis or bronchiolitis, chronic lower respiratory disease, upper respiratory disease, chronic heart failure exacerbation, ischemic heart disease, arrhythmia, cerebrovascular disease, or myocarditis, and alternative outcomes: selected cardiorespiratory hospitalizations combined cardiorespiratory hospitalizations.

<sup>c</sup> For hospitalization outcomes, the year 2015 will be included only when the number of observed events is consistently reported in 2015 versus 2016-2019. For alternative outcomes, the year 2015 will not be included.

<sup>d</sup> For alternative outcomes, mortality will not be included.

| Year              | Hospitalization |             |                           |                        |            |                       | Mortality                |                        |            |                       |
|-------------------|-----------------|-------------|---------------------------|------------------------|------------|-----------------------|--------------------------|------------------------|------------|-----------------------|
|                   | 0-5 months      | 6-11 months | 12-23 months <sup>a</sup> | 2-5 years <sup>a</sup> | 6-17 years | All ages <sup>c</sup> | 0-11 months <sup>b</sup> | 1-5 years <sup>b</sup> | 6-17 years | All ages <sup>c</sup> |
| 2015 <sup>d</sup> |                 |             |                           |                        |            |                       |                          |                        |            |                       |
| 2016              |                 |             |                           |                        |            |                       |                          |                        |            |                       |
| 2017              |                 |             |                           |                        |            |                       |                          |                        |            |                       |
| 2018              |                 |             |                           |                        |            |                       |                          |                        |            |                       |
| 2019              |                 |             |                           |                        |            |                       |                          |                        |            |                       |

Table A15. Incidence of RSV-attributable respiratory events for children in Spain, 2015-2019<sup>d</sup>.

<sup>a</sup> To be replaced by the concatenated age group 1-5 years if observed respiratory hospitalizations are <5 in >20% of the weeks.

<sup>b</sup> To be replaced by the concatenated age group 0-5 years if observed respiratory deaths are <5 in >20% of the months.

<sup>c</sup> standardized with January 1, 2022 census population figures for each age group.

<sup>d</sup> For hospitalization, the year 2015 will be included only when the number of observed events is consistently reported in 2015 versus 2016-2019.

Figure A1. Monthly (left) and weekly (right) observed number of events<sup>a</sup> in Spain, 2015-2019<sup>b</sup>.

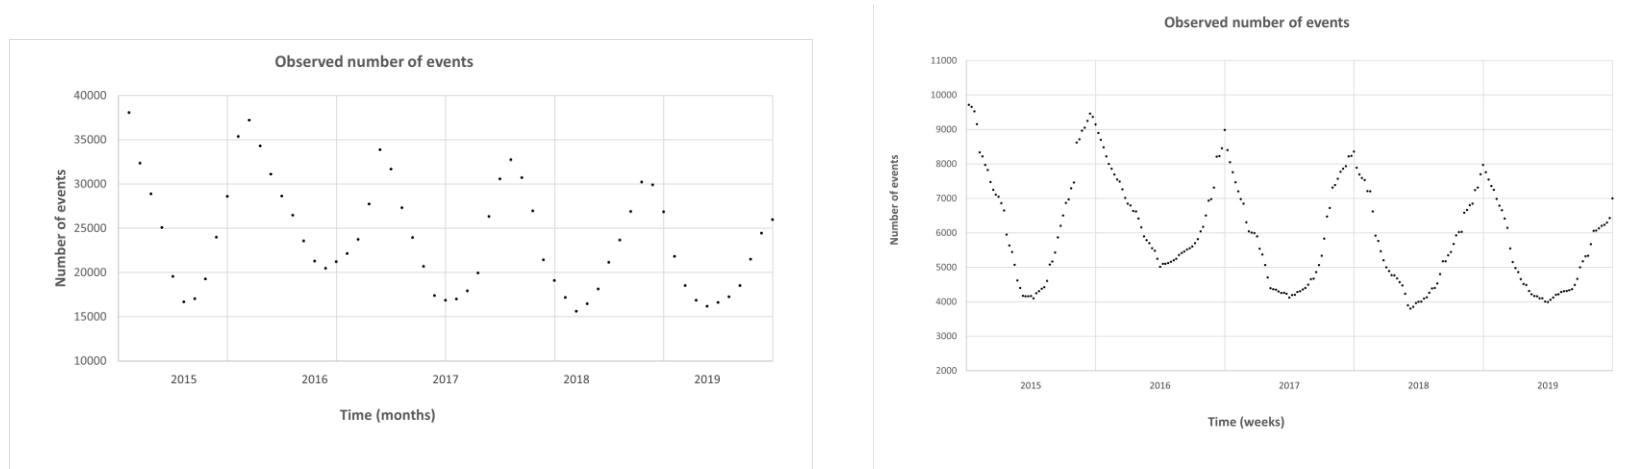

<sup>a</sup> events refers to the combination of event type (hospitalization or death) and outcome.

List of outcomes for adults: cardiorespiratory events, respiratory events, circulatory events, influenza or pneumonia, bronchitis or bronchiolitis, chronic lower respiratory disease, upper respiratory disease, chronic heart failure exacerbation, ischemic heart disease, arrhythmia, cerebrovascular disease, or myocarditis; For children outcomes are respiratory events.

For alternative outcomes (adults only), events refers to selected cardiorespiratory hospitalizations, or combined cardiorespiratory hospitalizations.

<sup>b</sup> For hospitalization outcomes, the year 2015 will be included only when the number of observed events is consistently reported in 2015 versus 2016-2019. For alternative outcomes, the year 2015 will not be included.

Figure A2. Monthly (left) and weekly (right) observed and model-based number of events<sup>a</sup> in Spain, 2015-2019<sup>b</sup>.

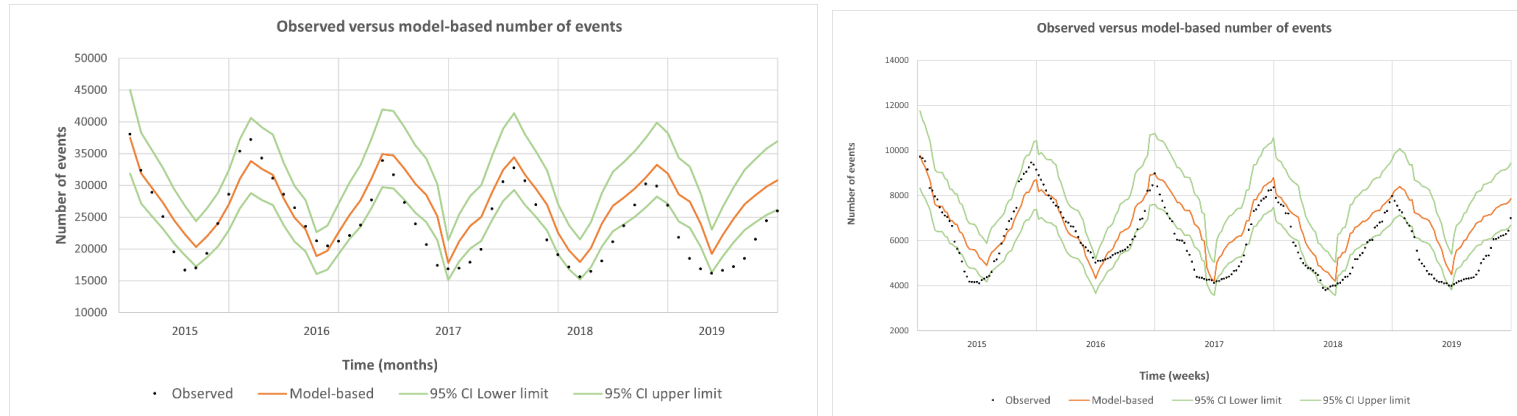

CI: confidence interval

<sup>a</sup> events refers to the combination of event type (hospitalization or death) and outcome.

List of outcomes for adults: cardiorespiratory events, respiratory events, circulatory events, influenza or pneumonia, bronchitis or bronchiolitis, chronic lower respiratory disease, upper respiratory disease, chronic heart failure exacerbation, ischemic heart disease, arrhythmia, cerebrovascular disease, or myocarditis; For children outcomes are respiratory events.

For alternative outcomes (adults only), events refers to selected cardiorespiratory hospitalizations, or combined cardiorespiratory hospitalizations.

<sup>b</sup> For hospitalization outcomes, the year 2015 will be included only when the number of observed events is consistently reported in 2015 versus 2016-2019. For alternative outcomes, the year 2015 will not be included.
